# Supplementary material for: Age-related variation in the oral microbiome of urban Cooper’s hawks (Accipiter cooperii)
Source: BMC Microbiol. 2019 Feb 21;19:47. doi: 10.1186/s12866-019-1413-y (PMC6385412; doi:10.1186/s12866-019-1413-y)
Supplement: Supplementary file 2 — Table S1. Summary of operational taxonomic units for oral microbiome of urban Cooper’s hawks. Excel file containing operational taxonomic units, taxonomy, and occurrence of each in individual hawks. (XLSX 115 kb) [file 12866_2019_1413_MOESM2_ESM.xlsx]

## Sheet: Sheet 1
Supplementary Table 1. Operational taxonomic units, taxonomy, and occurrence of each in individual hawks. Hawks are numbered to match Table 1. Values are read counts.
Asterisk indicates that the individual was excluded from analyses due to low richness, as described in text.
		Hawk individuals
#OTU ID	Taxonomy	1	2*	3	4	5	6	7	8	9	10	11	12	13	14	15	16	17	18	19	20	21	22	23	24	25	26	27	28	29	30	31
OTU_10;size=140167;	;Root;100%;Bacteria;91%;"Proteobacteria";32%;Alphaproteobacteria;11%;Rhodospirillales;5%;Acetobacteraceae;5%;Rubritepida;4%	0	0	0	0	0	0	0	0	0	0	0	0	0	0	0	0	0	0	0	0	0	0	0	0	0	0	0	2	1	0	1
OTU_1009;size=128;	;Root;100%;Bacteria;100%;Firmicutes;100%;Bacilli;100%;Bacillales;100%;Planococcaceae;59%;Lysinibacillus;42%	0	0	0	0	0	0	0	0	0	0	0	0	0	0	0	0	0	0	0	0	0	0	0	0	0	0	0	1	0	0	0
OTU_101;size=3506;	;Root;100%;Bacteria;84%;"Bacteroidetes";24%;Flavobacteriia;5%;"Flavobacteriales";5%;Flavobacteriaceae;4%;Joostella;3%	0	0	0	0	0	1	0	0	0	0	0	0	0	0	0	0	0	0	0	0	0	0	0	0	0	0	0	0	0	0	0
OTU_1011;size=37;	;Root;100%;Bacteria;100%;"Proteobacteria";100%;Alphaproteobacteria;100%;Rhodospirillales;100%;Acetobacteraceae;100%;Endobacter;30%	0	0	0	0	1	0	0	0	0	0	0	0	0	0	2	0	0	0	0	0	1	0	0	0	0	0	0	0	0	0	0
OTU_1012;size=174;	;Root;100%;Bacteria;100%;"Bacteroidetes";100%;Sphingobacteriia;100%;"Sphingobacteriales";100%;Chitinophagaceae;100%;Chitinophaga;73%	0	0	0	0	0	0	0	0	0	0	0	0	0	0	0	0	0	0	0	0	0	0	0	1	0	0	0	1	0	0	0
OTU_1017;size=51;	;Root;100%;Bacteria;100%;"Proteobacteria";100%;Alphaproteobacteria;100%;Alphaproteobacteria_incertae_sedis;100%;Geminicoccus;100%	0	0	0	0	1	0	0	0	0	0	0	0	0	0	0	0	0	0	0	0	0	0	0	0	0	0	0	0	0	0	0
OTU_102;size=2744;	;Root;100%;Bacteria;100%;Firmicutes;97%;Clostridia;97%;Clostridiales;97%;Lachnospiraceae;96%;Johnsonella;21%	1	0	1	3	5	55	136	165	32	132	35	116	228	22	299	317	241	96	16	405	281	97	262	69	86	4	3	8	3	8	120
OTU_1028;size=162;	;Root;100%;Bacteria;100%;"Bacteroidetes";100%;Sphingobacteriia;100%;"Sphingobacteriales";100%;Sphingobacteriaceae;100%;Pedobacter;100%	0	0	0	0	0	0	0	0	0	0	0	0	0	0	0	0	0	0	0	0	0	0	0	4	0	3	0	0	0	0	0
OTU_1038;size=35;	;Root;100%;Bacteria;100%;Firmicutes;100%;Bacilli;100%;Lactobacillales;96%;Enterococcaceae;63%;Enterococcus;61%	0	0	9	0	0	0	0	0	0	0	0	0	9	0	2	4	0	12	0	7	0	0	0	0	0	0	0	0	0	0	0
OTU_104;size=3653;	;Root;100%;Bacteria;85%;"Bacteroidetes";32%;Flavobacteriia;19%;"Flavobacteriales";19%;Flavobacteriaceae;17%;Leptobacterium;16%	0	1	0	1	6	0	0	0	0	2	0	0	0	0	1	0	0	0	0	1	0	0	0	0	1	0	1	0	0	0	0
OTU_1048;size=122;	;Root;100%;Bacteria;100%;"Actinobacteria";100%;Actinobacteria;100%;Actinobacteridae;100%;Actinomycetales;100%;Propionibacterineae;100%;Nocardioidaceae;99%;Nocardioides;98%	0	0	0	0	0	0	0	0	0	0	0	0	0	0	0	0	0	0	0	0	0	0	0	0	0	0	0	0	0	0	0
OTU_105;size=5289;	;Root;100%;Bacteria;100%;"Proteobacteria";100%;Alphaproteobacteria;100%;Rhizobiales;100%;Methylobacteriaceae;100%;Microvirga;100%	0	0	1	0	0	0	0	0	0	0	0	0	0	0	0	0	0	0	0	0	0	2	0	0	0	4	0	0	0	0	0
OTU_1054;size=92;	;Root;100%;Bacteria;100%;"Proteobacteria";100%;Alphaproteobacteria;100%;Sphingomonadales;99%;Sphingomonadaceae;81%;Novosphingobium;43%	0	0	0	0	1	0	0	0	0	0	0	0	0	0	0	0	0	0	0	0	0	0	0	0	0	0	0	0	0	0	0
OTU_1055;size=1221;	;Root;100%;Bacteria;100%;"Actinobacteria";100%;Actinobacteria;100%;Actinobacteridae;100%;Actinomycetales;100%;Corynebacterineae;100%;Corynebacteriaceae;100%;Corynebacterium;91%	2566	1305	1169	104	761	837	949	102	127	162	10	321	297	122	539	94	670	140	1503	46	166	301	171	231	473	194	55	207	119	127	441
OTU_1065;size=75;	;Root;100%;Bacteria;100%;"Proteobacteria";100%;Alphaproteobacteria;100%;Rhodospirillales;100%;Rhodospirillaceae;100%;Skermanella;100%	0	0	0	0	0	0	0	0	0	0	0	0	0	0	0	0	0	0	0	0	0	0	0	0	0	0	1	0	0	0	0
OTU_1069;size=31;	;Root;100%;Bacteria;100%;"Proteobacteria";100%;Alphaproteobacteria;100%;Rhodospirillales;100%;Acetobacteraceae;97%;Acidisphaera;10%	0	0	0	0	0	0	0	0	0	0	0	0	0	0	0	0	0	0	0	0	0	0	0	0	0	0	0	0	0	0	0
OTU_107;size=2535;	;Root;100%;Bacteria;100%;"Actinobacteria";100%;Actinobacteria;100%;Actinobacteridae;100%;Actinomycetales;100%;Micrococcineae;65%;Bogoriellaceae;16%;Bogoriella;16%	19	0	122	64	17	39	15	29	17	96	42	89	178	11	113	111	83	23	3	151	206	71	318	96	362	91	47	224	201	14	107
OTU_1076;size=87;	;Root;100%;Bacteria;100%;"Actinobacteria";99%;Actinobacteria;99%;Acidimicrobidae;93%;Acidimicrobiales;93%;"Acidimicrobineae";93%;"Acidimicrobineae"_incertae_sedis;52%;Aciditerrimonas;52%	0	0	0	1	0	0	0	0	0	0	0	0	0	0	0	0	0	0	0	0	0	0	0	0	0	0	0	0	0	0	0
OTU_108;size=6959;	;Root;100%;Bacteria;100%;"Actinobacteria";100%;Actinobacteria;100%;Actinobacteridae;100%;Actinomycetales;100%;Micrococcineae;85%;Intrasporangiaceae;29%;Ornithinibacter;3%	54	25	89	60	148	232	175	369	56	217	51	126	576	63	422	778	91	92	48	261	264	41	600	562	1057	115	53	253	154	156	949
OTU_109;size=4420;	;Root;100%;Archaea;100%;"Thaumarchaeota";99%;Nitrososphaerales;99%;Nitrososphaeraceae;99%;Nitrososphaera;99%	0	0	1	0	0	0	0	0	0	0	0	0	0	0	0	0	0	0	0	0	0	0	0	0	0	0	0	0	0	0	0
OTU_1090;size=83;	;Root;100%;Bacteria;100%;"Actinobacteria";100%;Thermoleophilia;59%;Thermoleophilales;59%;Thermoleophilaceae;59%;Thermoleophilum;59%	0	0	0	0	0	0	0	0	4	0	0	0	0	0	0	0	0	0	0	0	0	0	0	0	0	0	0	0	0	0	0
OTU_1096;size=618;	;Root;100%;Bacteria;96%;"Thermodesulfobacteria";2%;Thermodesulfobacteria;2%;Thermodesulfobacteriales;2%;Thermodesulfobacteriaceae;2%;Thermosulfurimonas;2%	0	0	0	0	0	0	0	0	0	0	0	0	0	0	0	0	0	0	0	0	0	0	0	0	0	0	0	0	0	0	0
OTU_110;size=2449;	;Root;100%;Bacteria;90%;Cyanobacteria/Chloroplast;12%;Chloroplast;12%;Chloroplast;12%;Bangiophyceae;12%	0	0	16	40	13	160	121	105	11	265	3	66	54	30	63	34	163	17	2	439	136	142	45	454	141	6	41	0	32	19	218
OTU_111;size=2470;	;Root;100%;Bacteria;100%;"Actinobacteria";100%;Actinobacteria;100%;Actinobacteridae;100%;Actinomycetales;100%;Kineosporiineae;21%;Kineosporiaceae;21%;Kineosporia;14%	649	402	219	32	29	189	131	27	28	9	0	10	16	9	129	90	131	49	376	6	10	53	38	3	92	24	7	11	22	3	48
OTU_1113;size=29;	;Root;100%;Bacteria;100%;Firmicutes;95%;Clostridia;88%;Clostridiales;88%;Clostridiales_Incertae Sedis XI;45%;Peptoniphilus;31%	3	0	0	0	1	0	0	0	0	0	0	0	1	0	0	0	0	0	0	3	0	0	0	0	13	0	2	0	9	3	4
OTU_1135;size=33;	;Root;100%;Bacteria;100%;"Proteobacteria";100%;Alphaproteobacteria;100%;Rhodospirillales;100%;Acetobacteraceae;92%;Acidicaldus;27%	0	0	0	0	0	0	0	0	0	0	0	0	0	0	0	0	0	0	0	0	0	0	0	0	0	1	0	0	0	0	0
OTU_114;size=4002;	;Root;100%;Bacteria;100%;"Actinobacteria";100%;Actinobacteria;100%;Actinobacteridae;100%;Actinomycetales;100%;Micrococcineae;100%;Dermabacteraceae;100%;Brachybacterium;86%	41	62	57	98	107	8	51	41	45	68	43	33	339	9	128	76	17	8	2	112	37	18	337	139	1132	26	159	244	192	55	963
OTU_1144;size=57;	;Root;100%;Bacteria;100%;"Proteobacteria";100%;Betaproteobacteria;100%;Ferritrophicales;62%;Ferritrophicaceae;62%;Ferritrophicum;62%	0	0	0	0	0	0	0	0	0	0	0	0	0	0	0	0	0	0	0	0	0	0	0	0	0	0	0	0	0	0	0
OTU_1147;size=32;	;Root;100%;Bacteria;100%;"Proteobacteria";92%;Gammaproteobacteria;85%;Pasteurellales;49%;Pasteurellaceae;49%;Volucribacter;22%	0	0	0	32	0	0	0	0	0	0	0	0	0	0	0	0	0	4	0	0	0	0	0	0	0	0	0	0	0	0	0
OTU_115;size=2997;	;Root;100%;Bacteria;90%;"Bacteroidetes";28%;Sphingobacteriia;6%;"Sphingobacteriales";6%;Sphingobacteriaceae;4%;Pseudosphingobacterium;4%	0	1	0	0	0	0	0	0	0	0	0	0	0	0	2	0	0	0	0	0	0	0	0	0	0	0	0	0	0	0	0
OTU_1153;size=101;	;Root;100%;Bacteria;100%;"Proteobacteria";100%;Alphaproteobacteria;100%;Rhodospirillales;100%;Acetobacteraceae;96%;Belnapia;56%	0	0	0	0	0	0	0	0	0	0	0	0	0	0	0	0	0	0	0	0	0	0	0	0	0	0	0	0	0	0	0
OTU_1161;size=28;	;Root;100%;Bacteria;100%;"Actinobacteria";100%;Actinobacteria;100%;Actinobacteridae;100%;Actinomycetales;100%;Micrococcineae;96%;Bogoriellaceae;58%;Georgenia;58%	0	0	0	0	0	0	0	0	0	0	0	0	0	0	0	0	0	0	0	0	0	0	0	0	0	0	0	0	0	0	0
OTU_1162;size=39;	;Root;100%;Bacteria;100%;"Proteobacteria";100%;Alphaproteobacteria;100%;Sphingomonadales;80%;Sphingomonadaceae;80%;Sphingomonas;73%	0	0	0	0	0	0	0	0	0	0	0	0	0	0	1	0	0	0	0	0	0	0	1	0	0	0	0	0	0	0	0
OTU_1166;size=65;	;Root;100%;Bacteria;94%;"Chloroflexi";62%;Caldilineae;28%;Caldilineales;28%;Caldilineaceae;28%;Litorilinea;22%	0	0	0	0	0	0	0	0	0	0	0	0	0	0	0	0	0	0	0	0	0	0	0	0	0	0	1	0	0	0	0
OTU_118;size=4064;	;Root;100%;Bacteria;98%;Cyanobacteria/Chloroplast;53%;Chloroplast;52%;Chloroplast;52%;Streptophyta;30%	0	0	0	0	0	0	0	0	0	0	0	0	0	0	0	0	0	0	0	0	0	0	0	0	0	0	0	0	0	0	0
OTU_1196;size=54;	;Root;100%;Bacteria;99%;"Gemmatimonadetes";41%;Gemmatimonadetes;41%;Gemmatimonadales;41%;Gemmatimonadaceae;41%;Gemmatimonas;41%	0	0	0	0	1	0	0	0	0	0	0	0	0	0	0	0	0	0	0	0	0	0	0	0	0	0	0	0	0	0	0
OTU_12;size=56975;	;Root;100%;Bacteria;100%;"Proteobacteria";100%;Gammaproteobacteria;99%;Cardiobacteriales;95%;Cardiobacteriaceae;95%;Suttonella;38%	8825	8163	8348	61	267	3461	1488	31	473	293	78	805	357	308	662	1346	3005	683	1543	1075	2135	3095	298	657	5240	1209	157	1315	987	704	3047
OTU_1202;size=33;	;Root;100%;Bacteria;100%;"Bacteroidetes";100%;Sphingobacteriia;100%;"Sphingobacteriales";100%;Chitinophagaceae;100%;Flavisolibacter;34%	0	0	0	0	0	0	0	0	0	0	0	0	0	0	0	0	0	0	0	0	0	0	0	1	0	0	0	0	0	0	0
OTU_1204;size=77;	;Root;100%;Bacteria;100%;"Proteobacteria";100%;Betaproteobacteria;100%;Burkholderiales;100%;Burkholderiaceae;100%;Ralstonia;100%	0	0	0	0	0	0	0	0	0	0	0	0	0	0	6	0	0	0	0	0	0	0	0	0	0	0	0	0	0	0	0
OTU_121;size=2890;	;Root;100%;Bacteria;100%;"Proteobacteria";25%;Betaproteobacteria;5%;Burkholderiales;5%;Alcaligenaceae;1%;Pelistega;1%	0	0	0	0	0	0	0	0	0	0	0	0	0	0	0	0	0	0	0	0	0	0	0	0	0	0	0	0	0	0	0
OTU_1217;size=180;	;Root;100%;Bacteria;100%;"Proteobacteria";100%;Alphaproteobacteria;100%;Rhizobiales;100%;Xanthobacteraceae;69%;Azorhizobium;23%	0	0	0	0	0	0	0	0	0	0	0	0	0	0	0	0	0	0	0	0	0	0	0	0	0	0	0	0	0	0	1
OTU_1226;size=25;	;Root;100%;Bacteria;100%;"Fusobacteria";100%;Fusobacteriia;100%;"Fusobacteriales";100%;"Leptotrichiaceae";100%;Streptobacillus;83%	0	0	0	32	0	0	0	0	0	0	0	1	0	0	0	0	0	0	0	0	0	0	0	0	0	0	0	0	0	0	0
OTU_123;size=2077;	;Root;100%;Bacteria;100%;"Tenericutes";100%;Mollicutes;100%;Mycoplasmatales;100%;Mycoplasmataceae;100%;Mycoplasma;100%	15	5	20	3	0	25	1	37	20	59	2	9	31	18	8	395	18	275	0	942	60	51	239	217	16	96	44	25	13	21	292
OTU_1230;size=45;	;Root;100%;Bacteria;100%;"Actinobacteria";100%;Actinobacteria;100%;Actinobacteridae;100%;Actinomycetales;100%;Propionibacterineae;100%;Nocardioidaceae;97%;Nocardioides;96%	0	0	0	0	0	0	0	0	0	0	0	0	0	0	0	0	0	0	0	0	0	0	1	0	0	0	0	0	0	0	0
OTU_1245;size=53;	;Root;100%;Bacteria;100%;"Proteobacteria";100%;Alphaproteobacteria;100%;Rhizobiales;100%;Bradyrhizobiaceae;56%;Bosea;44%	0	0	0	0	0	0	0	0	0	0	0	0	0	0	0	0	0	0	0	0	0	0	1	0	0	0	0	0	0	0	0
OTU_1251;size=24;	;Root;100%;Bacteria;100%;"Actinobacteria";100%;Actinobacteria;100%;Actinobacteridae;100%;Bifidobacteriales;100%;Bifidobacteriaceae;100%;Aeriscardovia;100%	0	0	0	0	0	0	0	0	0	0	0	0	0	0	0	0	29	7	0	0	0	0	0	0	0	0	0	0	0	0	0
OTU_1261;size=44;	;Root;100%;Bacteria;99%;"Proteobacteria";97%;Alphaproteobacteria;88%;Alphaproteobacteria_incertae_sedis;40%;Geminicoccus;40%	0	0	0	0	0	0	0	0	0	0	0	0	0	0	0	0	0	0	0	0	0	0	0	0	0	0	0	1	0	0	0
OTU_129;size=1895;	;Root;100%;Bacteria;100%;SR1;100%;SR1_genera_incertae_sedis;100%	0	0	0	0	1	105	154	474	72	100	1	31	153	1	0	0	455	159	13	95	174	9	62	108	0	0	4	0	0	0	0
OTU_1295;size=23;	;Root;100%;Bacteria;100%;"Proteobacteria";65%;Gammaproteobacteria;29%;Xanthomonadales;22%;Xanthomonadaceae;22%;Silanimonas;22%	0	0	0	0	0	1	0	0	0	0	0	0	0	0	0	25	2	0	0	0	2	0	0	0	0	0	0	0	0	0	2
OTU_13;size=59519;	;Root;100%;Bacteria;100%;"Proteobacteria";100%;Betaproteobacteria;100%;Neisseriales;91%;Neisseriaceae;91%;Neisseria;82%	6919	8110	2270	68	203	3008	3270	78	677	635	80	3010	1442	492	437	548	3602	859	1087	2705	6622	4785	1939	2008	2720	1358	595	1603	853	935	1272
OTU_1302;size=28;	;Root;100%;Bacteria;100%;"Gemmatimonadetes";99%;Gemmatimonadetes;99%;Gemmatimonadales;99%;Gemmatimonadaceae;99%;Gemmatimonas;99%	0	0	0	0	0	0	0	0	0	0	0	0	0	0	0	0	0	0	0	0	0	0	4	0	0	0	0	0	0	0	0
OTU_1303;size=23;	;Root;100%;Bacteria;100%;"Acidobacteria";27%;Acidobacteria_Gp16;26%;Gp16;26%	0	0	0	0	0	0	0	0	0	0	0	0	0	0	0	0	0	0	0	0	0	0	0	0	0	0	0	0	0	0	0
OTU_1305;size=67;	;Root;100%;Bacteria;100%;"Actinobacteria";100%;Actinobacteria;100%;Actinobacteridae;100%;Actinomycetales;100%;Propionibacterineae;100%;Nocardioidaceae;100%;Nocardioides;100%	0	0	0	0	0	0	0	0	0	0	0	0	0	0	0	0	0	0	0	0	0	0	0	0	0	0	0	1	0	0	0
OTU_131;size=2297;	;Root;100%;Bacteria;100%;"Bacteroidetes";100%;Flavobacteriia;99%;"Flavobacteriales";99%;Flavobacteriaceae;99%;Capnocytophaga;64%	4	3	16	27	1	13	34	31	19	52	4	88	50	8	169	34	493	93	1	295	170	92	156	201	360	23	25	13	46	13	135
OTU_1332;size=75;	;Root;100%;Bacteria;100%;"Chloroflexi";39%;Anaerolineae;24%;Anaerolineales;24%;Anaerolineaceae;24%;Bellilinea;16%	0	0	0	0	0	0	0	0	0	0	0	0	0	0	0	0	0	0	0	0	0	0	0	0	0	0	0	0	0	0	3
OTU_1345;size=21;	;Root;100%;Bacteria;100%;"Proteobacteria";100%;Betaproteobacteria;100%;Burkholderiales;100%;Alcaligenaceae;100%;Pelistega;87%	0	0	0	0	1	0	0	0	0	5	0	2	0	0	9	0	2	9	0	0	0	0	0	0	0	0	0	0	0	0	0
OTU_1350;size=37;	;Root;100%;Bacteria;100%;"Proteobacteria";100%;Gammaproteobacteria;100%;Pasteurellales;100%;Pasteurellaceae;100%;Actinobacillus;29%	0	0	0	0	0	0	0	0	0	0	0	0	0	0	0	0	2	0	0	0	0	0	0	0	0	0	0	0	0	0	0
OTU_136;size=1695;	;Root;100%;Bacteria;100%;"Proteobacteria";93%;Gammaproteobacteria;76%;Oceanospirillales;8%;Oleiphilaceae;6%;Oleiphilus;6%	2	0	17	22	16	25	51	50	2	176	72	87	51	4	37	75	101	12	15	108	54	36	309	170	258	9	35	77	11	15	77
OTU_1370;size=21;	;Root;100%;Bacteria;100%;"Fusobacteria";100%;Fusobacteriia;100%;"Fusobacteriales";100%;"Leptotrichiaceae";99%;Streptobacillus;77%	0	0	0	25	0	0	0	0	0	0	0	0	0	0	0	0	0	0	0	0	0	0	0	0	0	0	0	0	0	0	0
OTU_1374;size=153;	;Root;100%;Bacteria;100%;"Actinobacteria";100%;Actinobacteria;100%;Actinobacteridae;100%;Actinomycetales;100%;Propionibacterineae;98%;Nocardioidaceae;98%;Nocardioides;95%	0	0	0	0	0	0	0	0	0	0	0	0	0	0	0	0	0	2	0	0	0	0	0	0	0	0	0	0	0	0	0
OTU_138;size=5645;	;Root;100%;Bacteria;100%;"Actinobacteria";100%;Actinobacteria;100%;Actinobacteridae;100%;Actinomycetales;100%;Streptomycineae;98%;Streptomycetaceae;98%;Streptomyces;89%	0	0	0	0	0	0	0	0	0	0	0	0	0	0	0	0	0	0	0	0	0	0	0	0	0	0	0	0	0	0	0
OTU_1386;size=32;	;Root;100%;Bacteria;100%;Firmicutes;100%;Bacilli;100%;Lactobacillales;100%;Lactobacillaceae;100%;Lactobacillus;96%	0	0	0	0	0	0	0	0	0	0	0	0	0	0	0	0	16	24	0	0	0	0	0	0	0	0	0	0	0	0	0
OTU_14;size=52327;	;Root;100%;Bacteria;92%;"Proteobacteria";43%;Alphaproteobacteria;16%;Rhodospirillales;8%;Acetobacteraceae;8%;Rubritepida;6%	0	0	0	0	0	0	0	0	0	0	0	0	1	0	0	1	3	1	0	2	0	0	0	0	0	0	0	0	0	1	0
OTU_141;size=6340;	;Root;100%;Bacteria;100%;"Actinobacteria";100%;Actinobacteria;100%;Actinobacteridae;100%;Actinomycetales;100%;Streptomycineae;100%;Streptomycetaceae;100%;Streptomyces;99%	0	0	0	0	0	0	0	0	0	0	0	0	0	0	0	0	0	0	0	0	0	0	0	0	0	0	0	0	0	0	0
OTU_1410;size=60;	;Root;100%;Bacteria;100%;"Proteobacteria";100%;Alphaproteobacteria;100%;Sphingomonadales;89%;Sphingomonadaceae;89%;Sphingomonas;63%	0	0	0	0	0	0	0	0	0	0	0	0	0	0	0	0	0	0	0	0	0	0	0	3	0	0	0	0	0	0	0
OTU_1416;size=20;	;Root;100%;Bacteria;100%;"Bacteroidetes";99%;"Bacteroidia";88%;"Bacteroidales";88%;"Prevotellaceae";73%;Paraprevotella;55%	0	0	0	13	0	0	0	0	0	0	0	0	8	0	0	0	0	0	0	0	0	0	0	0	0	0	0	0	0	0	0
OTU_142;size=1481;	;Root;100%;Bacteria;100%;"Proteobacteria";100%;Gammaproteobacteria;95%;Pasteurellales;46%;Pasteurellaceae;46%;Nicoletella;13%	28	86	0	41	0	5	8	0	4	89	0	2	19	1	0	6	0	1154	0	207	0	6	4	1	23	0	3	54	6	0	6
OTU_143;size=1504;	;Root;100%;Bacteria;100%;Firmicutes;70%;Clostridia;52%;Clostridiales;52%;Clostridiales_Incertae Sedis XI;34%;Gallicola;17%	1	3	10	7	11	29	20	66	3	14	1	15	84	1	105	185	73	18	17	56	23	3	33	80	271	8	5	10	24	126	464
OTU_144;size=2494;	;Root;100%;Bacteria;100%;"Actinobacteria";100%;Actinobacteria;100%;Actinobacteridae;100%;Actinomycetales;100%;Frankineae;100%;Geodermatophilaceae;100%;Blastococcus;84%	0	0	0	0	0	0	0	0	0	0	0	0	0	0	0	0	7	0	0	1	0	1	0	0	1	1	0	0	0	0	0
OTU_1454;size=31;	;Root;100%;Bacteria;100%;Candidatus Saccharibacteria;100%;Saccharibacteria_genera_incertae_sedis;100%	0	0	0	0	0	1	7	0	0	0	0	0	3	0	2	1	0	0	0	3	0	1	0	2	6	0	0	0	0	2	26
OTU_1460;size=78;	;Root;100%;Bacteria;100%;"Actinobacteria";100%;Actinobacteria;100%;Actinobacteridae;100%;Actinomycetales;100%;Frankineae;100%;Acidothermaceae;75%;Acidothermus;75%	0	0	0	0	0	0	0	0	0	0	0	0	0	0	0	0	0	0	0	0	0	0	0	0	0	0	0	0	0	0	0
OTU_1485;size=43;	;Root;100%;Bacteria;100%;"Actinobacteria";90%;Actinobacteria;90%;Rubrobacteridae;82%;Solirubrobacterales;67%;Solirubrobacteraceae;49%;Solirubrobacter;49%	0	0	1	0	0	0	0	0	0	0	0	0	0	0	0	0	0	0	0	0	0	0	0	0	0	0	0	0	0	0	0
OTU_1497;size=697;	;Root;100%;Bacteria;100%;"Proteobacteria";100%;Gammaproteobacteria;100%;Cardiobacteriales;100%;Cardiobacteriaceae;100%;Suttonella;99%	35	9	45	19	110	122	268	177	79	45	8	271	22	235	240	649	188	90	13	88	2192	735	523	1911	445	285	127	2137	61	4	3369
OTU_15;size=50840;	;Root;100%;Bacteria;100%;"Proteobacteria";100%;Alphaproteobacteria;100%;Rhodobacterales;99%;Rhodobacteraceae;99%;Rhodobacter;97%	0	0	0	0	0	0	0	0	0	0	0	0	0	0	0	0	0	0	0	2	0	0	0	0	0	0	0	0	0	0	0
OTU_1516;size=18;	;Root;100%;Bacteria;100%;"Proteobacteria";98%;Gammaproteobacteria;98%;Pasteurellales;98%;Pasteurellaceae;98%;Gallibacterium;40%	0	0	0	22	0	0	0	0	0	0	0	0	0	0	0	0	0	0	0	0	0	0	0	0	0	0	0	0	0	0	0
OTU_152;size=1882;	;Root;100%;Bacteria;100%;"Proteobacteria";71%;Gammaproteobacteria;18%;Pasteurellales;10%;Pasteurellaceae;10%;Lonepinella;3%	0	0	3	3	0	14	12	20	0	4	1	14	51	5	22	22	42	12	0	485	17	15	934	53	343	0	5	2	2	2	95
OTU_1525;size=23;	;Root;100%;Bacteria;100%;Firmicutes;100%;Bacilli;100%;Bacillales;100%;Paenibacillaceae 1;100%;Paenibacillus;100%	0	0	0	0	0	0	0	0	0	0	0	0	0	0	0	0	0	0	0	0	0	0	1	0	0	0	0	0	0	0	0
OTU_153;size=2005;	;Root;100%;Bacteria;100%;"Proteobacteria";100%;Gammaproteobacteria;100%;Pseudomonadales;100%;Pseudomonadaceae;100%;Pseudomonas;95%	0	0	0	0	0	0	0	0	0	0	0	0	0	0	0	0	0	0	0	0	0	0	0	0	1	0	0	0	0	1	0
OTU_1534;size=17;	;Root;100%;Bacteria;100%;"Bacteroidetes";100%;"Bacteroidia";100%;"Bacteroidales";100%;"Prevotellaceae";88%;Prevotella;79%	0	0	0	0	1	0	0	0	0	0	0	0	0	0	0	0	16	0	0	5	0	0	0	0	0	0	0	0	0	0	0
OTU_1552;size=96;	;Root;100%;Bacteria;100%;"Proteobacteria";100%;Alphaproteobacteria;100%;Rhodobacterales;100%;Rhodobacteraceae;100%;Rubellimicrobium;99%	0	0	0	0	0	0	0	0	0	0	0	0	0	0	0	0	0	0	0	0	0	0	0	0	0	2	0	0	0	0	0
OTU_156;size=4299;	;Root;100%;Bacteria;100%;"Actinobacteria";100%;Actinobacteria;100%;Actinobacteridae;100%;Actinomycetales;100%;Micrococcineae;100%;Microbacteriaceae;93%;Microcella;42%	2	3	0	1	18	0	0	1	0	4	12	8	27	5	0	2	62	10	10	3	4	4	20	3	66	0	4	3	0	16	180
OTU_1569;size=30;	;Root;100%;Bacteria;99%;candidate division WPS-1;56%;WPS-1_genera_incertae_sedis;56%	0	0	0	0	0	0	0	0	0	0	0	0	0	0	0	0	0	0	0	0	0	0	0	0	0	0	0	0	0	0	0
OTU_157;size=1176;	;Root;100%;Bacteria;100%;"Actinobacteria";99%;Actinobacteria;99%;Actinobacteridae;99%;Actinomycetales;99%;Micrococcineae;56%;Jonesiaceae;42%;Jonesia;42%	0	0	7	8	3	11	14	37	2	3	1	5	48	3	94	35	101	36	0	65	13	1	51	25	661	1	14	0	24	6	173
OTU_158;size=4027;	;Root;100%;Bacteria;100%;"Actinobacteria";100%;Actinobacteria;100%;Actinobacteridae;100%;Actinomycetales;100%;Frankineae;100%;Geodermatophilaceae;100%;Geodermatophilus;100%	0	0	0	1	0	0	0	0	0	1	0	0	0	0	0	0	1	0	8	0	0	1	0	0	0	2	0	0	0	0	0
OTU_1580;size=38;	;Root;100%;Bacteria;100%;"Gemmatimonadetes";100%;Gemmatimonadetes;100%;Gemmatimonadales;100%;Gemmatimonadaceae;100%;Gemmatimonas;100%	0	0	0	0	0	0	0	0	0	0	0	0	0	0	0	0	0	0	0	0	0	0	0	0	0	0	0	0	0	0	0
OTU_1581;size=26;	;Root;100%;Bacteria;100%;"Bacteroidetes";99%;Cytophagia;97%;Cytophagales;97%;Cytophagaceae;97%;Hymenobacter;42%	0	0	0	1	0	0	0	0	0	0	0	0	0	0	0	0	0	0	0	0	0	0	0	0	0	0	0	0	0	0	0
OTU_1585;size=37;	;Root;100%;Bacteria;100%;"Acidobacteria";100%;Acidobacteria_Gp16;100%;Gp16;100%	0	0	1	0	0	0	0	0	0	0	0	0	0	0	0	0	0	0	0	0	0	0	0	0	0	0	0	0	0	0	0
OTU_1586;size=24;	;Root;100%;Bacteria;100%;Firmicutes;100%;Negativicutes;100%;Selenomonadales;100%;Veillonellaceae;100%;Veillonella;100%	0	0	1	5	0	0	0	0	0	0	0	0	0	0	0	0	0	0	0	0	0	0	0	1	0	0	0	0	0	0	0
OTU_1598;size=27;	;Root;100%;Bacteria;100%;"Gemmatimonadetes";29%;Gemmatimonadetes;29%;Gemmatimonadales;29%;Gemmatimonadaceae;29%;Gemmatimonas;29%	0	0	0	0	0	0	0	0	0	0	0	0	0	0	0	0	0	0	0	0	0	0	0	0	1	1	0	0	0	0	0
OTU_160;size=2419;	;Root;100%;Bacteria;100%;"Tenericutes";100%;Mollicutes;100%;Mycoplasmatales;100%;Mycoplasmataceae;100%;Mycoplasma;100%	0	0	6	13	0	41	39	114	10	46	1	11	18	4	67	92	49	51	2	294	132	10	399	288	380	0	8	7	21	3	100
OTU_161;size=1397;	;Root;100%;Bacteria;100%;"Proteobacteria";100%;Alphaproteobacteria;100%;Rhodospirillales;100%;Acetobacteraceae;100%;Endobacter;25%	1	0	0	0	2	0	0	0	0	0	0	0	0	0	7	0	0	3	0	0	1	0	0	0	0	0	0	0	0	0	0
OTU_1614;size=22;	;Root;100%;Bacteria;100%;"Proteobacteria";100%;Deltaproteobacteria;100%;Myxococcales;100%;Nannocystineae;100%;Nannocystaceae;100%;Nannocystis;100%	0	0	0	0	0	0	0	0	0	0	1	0	0	0	0	0	0	0	0	0	0	0	0	0	0	0	0	0	0	0	0
OTU_1616;size=25;	;Root;100%;Bacteria;100%;"Proteobacteria";100%;Gammaproteobacteria;100%;Oceanospirillales;100%;Halomonadaceae;100%;Halomonas;99%	0	0	0	0	0	0	0	0	0	0	0	0	0	0	0	0	0	0	0	0	0	0	2	1	0	0	0	0	0	0	0
OTU_163;size=1021;	;Root;100%;Bacteria;100%;"Bacteroidetes";100%;"Bacteroidia";100%;"Bacteroidales";100%;"Porphyromonadaceae";100%;Porphyromonas;100%	62	0	0	0	0	0	0	0	0	6	10	2	7	0	0	0	0	0	0	0	0	0	0	1	459	0	2	0	675	0	0
OTU_166;size=977;	;Root;100%;Bacteria;100%;Firmicutes;96%;Clostridia;95%;Clostridiales;90%;Peptostreptococcaceae;26%;Peptostreptococcaceae_incertae_sedis;21%	42	0	25	10	1	32	27	5	0	18	0	13	1	4	4	146	296	21	28	7	1	0	17	155	53	14	1	0	2	25	209
OTU_1661;size=48;	;Root;100%;Bacteria;100%;"Bacteroidetes";100%;Cytophagia;100%;Cytophagales;100%;Cytophagaceae;100%;Hymenobacter;100%	0	0	0	0	0	0	0	0	0	0	0	0	0	0	2	0	0	0	0	0	0	0	0	2	0	0	0	0	0	0	0
OTU_167;size=971;	;Root;100%;Bacteria;100%;Firmicutes;100%;Bacilli;100%;Lactobacillales;98%;Aerococcaceae;76%;Facklamia;34%	8	0	21	8	15	46	37	8	13	19	4	28	16	3	26	9	54	4	15	158	73	30	13	205	129	13	46	43	8	26	67
OTU_168;size=2326;	;Root;100%;Bacteria;100%;Firmicutes;100%;Clostridia;100%;Clostridiales;100%;Eubacteriaceae;54%;Eubacterium;54%	1	4	8	13	0	10	34	69	7	189	33	64	275	26	171	94	86	15	1	89	17	0	248	35	778	27	20	19	47	15	381
OTU_1686;size=21;	;Root;100%;Bacteria;100%;"Verrucomicrobia";100%;Verrucomicrobiae;100%;Verrucomicrobiales;100%;Verrucomicrobiaceae;100%;Luteolibacter;100%	0	0	0	0	0	0	0	0	0	0	0	0	0	0	0	0	0	0	0	0	1	0	0	0	0	0	0	0	0	0	0
OTU_169;size=1028;	;Root;100%;Bacteria;100%;"Proteobacteria";100%;Alphaproteobacteria;100%;Rhizobiales;100%;Methylobacteriaceae;100%;Methylobacterium;100%	0	0	0	2	2	0	4	2	0	14	2	2	0	0	3	3	6	11	6	32	14	0	2	7	0	9	1	1	0	0	2
OTU_17;size=42071;	;Root;100%;Bacteria;100%;Firmicutes;100%;Negativicutes;100%;Selenomonadales;100%;Veillonellaceae;100%;Veillonella;50%	379	224	1104	384	1189	570	1125	872	261	553	223	572	2129	72	1401	2943	1123	620	217	1326	573	210	4351	2054	4206	206	330	992	1293	1265	12257
OTU_170;size=904;	;Root;100%;Bacteria;100%;"Actinobacteria";100%;Actinobacteria;100%;Actinobacteridae;100%;Actinomycetales;100%;Actinomycineae;70%;Actinomycetaceae;70%;Actinomyces;70%	0	0	12	2	32	15	4	7	0	8	1	10	13	0	46	56	18	0	0	87	72	35	184	37	228	40	5	26	21	42	103
OTU_171;size=1462;	;Root;100%;Bacteria;100%;"Proteobacteria";100%;Alphaproteobacteria;100%;Rhizobiales;100%;Bradyrhizobiaceae;100%;Bradyrhizobium;79%	0	0	1	0	0	0	0	2	0	0	0	0	3	0	0	0	0	0	0	0	0	0	0	0	0	0	0	0	0	0	0
OTU_1712;size=15;	;Root;100%;Bacteria;100%;"Proteobacteria";100%;Gammaproteobacteria;100%;Pasteurellales;99%;Pasteurellaceae;99%;Actinobacillus;63%	0	0	0	18	0	0	0	0	0	0	0	0	0	0	0	0	0	0	0	0	1	0	0	0	0	0	0	0	0	0	0
OTU_1718;size=40;	;Root;100%;Bacteria;100%;"Actinobacteria";100%;Actinobacteria;100%;Actinobacteridae;100%;Actinomycetales;100%;Frankineae;98%;Geodermatophilaceae;98%;Blastococcus;61%	0	0	0	0	0	0	0	0	0	0	0	0	0	0	0	0	0	0	0	0	0	0	0	0	0	1	0	0	0	0	0
OTU_174;size=855;	;Root;100%;Bacteria;100%;Firmicutes;75%;Clostridia;73%;Clostridiales;72%;Clostridiales_Incertae Sedis XII;57%;Guggenheimella;57%	3	1	0	4	9	10	4	5	0	9	0	4	142	3	19	75	27	41	0	102	24	27	8	7	227	60	5	12	25	26	131
OTU_176;size=2206;	;Root;100%;Bacteria;100%;"Actinobacteria";100%;Actinobacteria;100%;Actinobacteridae;100%;Actinomycetales;100%;Micromonosporineae;100%;Micromonosporaceae;100%;Couchioplanes;50%	0	0	0	0	0	0	5	0	0	0	0	0	0	0	0	0	0	0	0	0	0	0	0	0	0	0	0	0	0	0	0
OTU_177;size=872;	;Root;100%;Bacteria;86%;"Bacteroidetes";25%;Flavobacteriia;12%;"Flavobacteriales";12%;Flavobacteriaceae;12%;Lutaonella;8%	0	0	0	1	0	0	0	0	0	0	0	0	0	0	1	0	0	0	0	0	0	0	0	0	0	0	0	0	0	0	0
OTU_1774;size=68;	;Root;100%;Bacteria;100%;"Proteobacteria";100%;Alphaproteobacteria;100%;Rhizobiales;100%;Hyphomicrobiaceae;94%;Rhodoplanes;93%	0	0	0	0	0	0	0	0	0	5	0	0	0	0	0	0	0	0	0	0	0	0	0	0	0	0	0	0	0	0	0
OTU_178;size=2420;	;Root;100%;Bacteria;100%;"Proteobacteria";100%;Gammaproteobacteria;100%;Xanthomonadales;99%;Sinobacteraceae;99%;Steroidobacter;99%	0	0	0	0	0	0	0	0	0	0	0	1	0	0	0	0	0	0	0	0	0	0	0	0	0	0	0	0	0	0	0
OTU_1808;size=26;	;Root;100%;Bacteria;100%;"Proteobacteria";100%;Alphaproteobacteria;100%;Sphingomonadales;100%;Sphingomonadaceae;100%;Sphingomonas;98%	0	0	0	0	0	0	0	0	0	0	0	0	0	0	0	0	0	0	0	0	0	0	1	0	0	0	0	0	0	0	0
OTU_1851;size=63;	;Root;100%;Bacteria;99%;Cyanobacteria/Chloroplast;57%;Chloroplast;56%;Chloroplast;56%;Streptophyta;30%	0	0	0	0	0	0	0	0	0	0	0	0	0	0	0	0	0	0	0	0	0	1	0	0	0	0	0	0	0	0	0
OTU_1869;size=39;	;Root;100%;Bacteria;100%;"Proteobacteria";73%;Deltaproteobacteria;59%;Myxococcales;49%;Sorangiineae;39%;Phaselicystidaceae;22%;Phaselicystis;22%	0	0	0	0	1	0	0	0	0	0	0	0	0	0	0	0	0	0	0	0	0	0	0	0	0	0	0	0	0	0	0
OTU_188;size=783;	;Root;100%;Bacteria;100%;"Tenericutes";100%;Mollicutes;100%;Mycoplasmatales;100%;Mycoplasmataceae;100%;Mycoplasma;100%	38	257	437	0	0	11	4	1	1	2	0	0	2	0	5	49	27	3	0	0	5	13	0	3	43	1	1	16	1	3	1
OTU_1881;size=12;	;Root;100%;Bacteria;99%;"Proteobacteria";98%;Deltaproteobacteria;83%;Myxococcales;78%;Sorangiineae;77%;Polyangiaceae;60%;Chondromyces;55%	0	0	0	0	0	0	0	0	0	0	0	0	0	0	0	0	0	0	0	0	0	0	0	0	0	0	0	0	0	0	0
OTU_189;size=773;	;Root;100%;Bacteria;100%;Firmicutes;91%;Clostridia;89%;Clostridiales;87%;Clostridiales_Incertae Sedis XII;6%;Acidaminobacter;6%	4	0	86	0	1	99	63	21	23	7	1	17	2	8	36	35	90	3	0	149	130	33	1	16	39	11	7	7	12	3	30
OTU_19;size=38196;	;Root;100%;Bacteria;100%;"Proteobacteria";100%;Betaproteobacteria;100%;Neisseriales;100%;Neisseriaceae;100%;Neisseria;100%	0	0	0	0	0	0	0	0	0	7	0	0	0	0	0	0	1	0	0	0	0	0	0	0	0	0	0	68	0	0	0
OTU_1903;size=12;	;Root;100%;Bacteria;100%;"Proteobacteria";96%;Gammaproteobacteria;88%;Cardiobacteriales;33%;Cardiobacteriaceae;33%;Dichelobacter;23%	0	0	0	15	0	0	0	0	0	0	0	0	0	0	0	0	0	0	0	0	0	0	0	0	0	0	0	0	0	0	0
OTU_1913;size=25;	;Root;100%;Bacteria;100%;"Actinobacteria";100%;Thermoleophilia;46%;Thermoleophilales;46%;Thermoleophilaceae;46%;Thermoleophilum;46%	0	0	0	0	0	0	0	0	0	0	0	0	0	0	0	0	0	0	0	0	0	0	0	0	0	0	0	0	0	0	0
OTU_1916;size=29;	;Root;100%;Bacteria;100%;"Actinobacteria";100%;Actinobacteria;100%;Actinobacteridae;100%;Actinomycetales;100%;Micromonosporineae;100%;Micromonosporaceae;100%;Catellatospora;100%	0	0	0	0	0	0	0	0	0	0	0	0	0	0	0	0	0	0	0	0	0	0	0	0	0	0	0	0	0	0	0
OTU_192;size=807;	;Root;100%;Bacteria;100%;Firmicutes;96%;Clostridia;96%;Clostridiales;96%;Peptococcaceae 1;69%;Peptococcus;67%	8	3	23	14	3	11	13	36	3	37	0	14	69	3	7	6	44	5	7	85	31	9	4	111	203	20	23	15	21	17	131
OTU_195;size=1490;	;Root;100%;Bacteria;100%;"Proteobacteria";100%;Alphaproteobacteria;100%;Rhizobiales;100%;"Aurantimonadaceae";77%;Aurantimonas;77%	0	0	0	0	0	0	0	0	0	0	0	0	0	0	0	0	0	0	0	0	0	0	0	0	0	0	0	0	0	0	0
OTU_1954;size=15;	;Root;100%;Bacteria;100%;"Verrucomicrobia";98%;Subdivision3;97%;Subdivision3_genera_incertae_sedis;97%	0	0	0	0	0	0	0	0	0	0	0	0	0	0	0	0	0	0	0	0	0	0	0	0	0	0	0	1	0	0	0
OTU_196;size=1317;	;Root;100%;Bacteria;100%;"Actinobacteria";100%;Actinobacteria;100%;Actinobacteridae;100%;Actinomycetales;100%;Frankineae;100%;Geodermatophilaceae;99%;Modestobacter;57%	0	0	0	0	0	0	0	0	0	0	0	0	0	0	0	0	0	0	0	0	0	0	0	2	0	0	0	0	0	0	0
OTU_1973;size=14;	;Root;100%;Bacteria;100%;"Bacteroidetes";97%;"Bacteroidia";97%;"Bacteroidales";97%;"Prevotellaceae";95%;Prevotella;90%	0	0	0	0	0	0	0	0	0	0	0	0	0	0	17	0	0	0	0	0	0	0	0	0	0	0	0	0	0	0	0
OTU_199;size=692;	;Root;100%;Bacteria;100%;"Bacteroidetes";100%;"Bacteroidia";100%;"Bacteroidales";100%;"Porphyromonadaceae";100%;Porphyromonas;65%	0	0	0	0	0	321	67	20	74	99	5	110	65	60	0	0	0	0	0	0	0	0	0	0	0	0	0	0	0	0	0
OTU_1993;size=52;	;Root;100%;Bacteria;100%;"Actinobacteria";100%;Actinobacteria;100%;Actinobacteridae;100%;Actinomycetales;100%;Propionibacterineae;100%;Nocardioidaceae;97%;Marmoricola;55%	0	0	0	0	0	0	0	0	0	0	0	0	0	0	0	0	0	0	0	0	0	0	0	0	0	0	0	0	0	0	0
OTU_20;size=49698;	;Root;100%;Bacteria;100%;"Proteobacteria";100%;Gammaproteobacteria;100%;Pseudomonadales;100%;Moraxellaceae;100%;Moraxella;98%	373	68	122	281	134	180	217	129	44	224	23	1584	292	406	320	1640	1565	288	120	2247	17569	4773	2682	8508	779	1711	949	1803	965	715	2614
OTU_200;size=758;	;Root;100%;Bacteria;100%;"Proteobacteria";100%;Alphaproteobacteria;100%;Rhizobiales;100%;Methylobacteriaceae;100%;Methylobacterium;96%	1	2	3	2	5	0	10	6	7	9	8	3	7	4	6	22	39	16	15	12	25	3	15	5	6	10	6	11	2	1	4
OTU_2010;size=11;	;Root;100%;Bacteria;100%;Firmicutes;100%;Clostridia;100%;Clostridiales;100%;Peptostreptococcaceae;97%;Peptostreptococcus;88%	0	0	0	2	1	0	0	0	0	5	0	0	0	0	0	0	13	0	0	0	0	0	0	0	0	0	0	0	0	0	0
OTU_2011;size=54;	;Root;100%;Bacteria;100%;Cyanobacteria/Chloroplast;90%;Chloroplast;89%;Chloroplast;89%;Streptophyta;89%	0	0	0	0	0	0	0	0	0	0	0	0	0	0	0	0	1	0	0	0	0	0	0	0	0	0	0	0	0	0	0
OTU_2013;size=11;	;Root;100%;Bacteria;100%;"Bacteroidetes";98%;Cytophagia;95%;Cytophagales;95%;Cytophagaceae;95%;Hymenobacter;93%	0	0	0	0	0	0	0	0	0	0	0	0	0	0	15	0	0	0	0	0	0	0	0	0	0	0	0	0	0	0	0
OTU_2021;size=19;	;Root;100%;Bacteria;100%;"Actinobacteria";100%;Actinobacteria;100%;Actinobacteridae;100%;Actinomycetales;100%;Corynebacterineae;100%;Nocardiaceae;100%;Rhodococcus;98%	0	0	0	0	0	0	0	1	0	0	0	0	0	0	0	0	0	0	0	0	0	0	0	0	0	0	0	0	0	0	0
OTU_204;size=1840;	;Root;100%;Bacteria;100%;"Proteobacteria";100%;Betaproteobacteria;100%;Burkholderiales;100%;Comamonadaceae;99%;Variovorax;55%	0	0	0	0	0	0	0	0	0	0	0	0	0	0	0	0	7	0	0	0	0	0	0	0	0	2	0	0	0	0	0
OTU_2041;size=11;	;Root;100%;Bacteria;100%;"Bacteroidetes";100%;Flavobacteriia;100%;"Flavobacteriales";100%;Flavobacteriaceae;100%;Capnocytophaga;100%	0	0	0	0	0	0	0	0	0	0	0	0	0	0	0	0	0	0	0	0	0	0	0	0	0	0	0	0	0	0	0
OTU_205;size=1246;	;Root;100%;Bacteria;98%;Cyanobacteria/Chloroplast;55%;Chloroplast;55%;Chloroplast;55%;Bacillariophyta;14%	0	0	0	0	0	0	0	0	0	0	0	0	0	0	0	0	0	0	0	0	0	0	0	0	0	0	0	0	0	0	0
OTU_2054;size=25;	;Root;100%;Bacteria;100%;"Proteobacteria";100%;Deltaproteobacteria;99%;Myxococcales;99%;Nannocystineae;99%;Nannocystaceae;98%;Plesiocystis;30%	0	0	0	1	0	0	0	0	0	0	0	0	0	0	0	0	0	0	0	0	0	0	0	0	0	0	0	0	0	0	0
OTU_206;size=1986;	;Root;100%;Bacteria;100%;"Proteobacteria";100%;Gammaproteobacteria;51%;Pseudomonadales;51%;Pseudomonadaceae;51%;Rhizobacter;51%	0	0	0	0	0	0	0	0	0	0	0	0	0	0	6	0	0	0	0	0	1	0	0	0	0	0	0	6	0	0	0
OTU_2085;size=10;	;Root;100%;Bacteria;100%;"Proteobacteria";100%;Betaproteobacteria;99%;Burkholderiales;85%;Sutterellaceae;34%;Parasutterella;33%	0	0	0	14	0	0	0	0	0	0	0	0	0	0	0	0	0	0	0	0	0	0	0	1	0	0	0	0	0	0	0
OTU_2088;size=41;	;Root;100%;Bacteria;100%;"Actinobacteria";100%;Actinobacteria;100%;Actinobacteridae;100%;Actinomycetales;100%;Micrococcineae;100%;Promicromonosporaceae;88%;Isoptericola;48%	0	0	0	0	0	0	0	0	0	0	0	0	0	0	0	0	0	0	0	0	0	0	0	0	0	0	0	0	0	0	0
OTU_209;size=1201;	;Root;100%;Bacteria;100%;"Proteobacteria";100%;Alphaproteobacteria;100%;Rhizobiales;100%;Methylobacteriaceae;51%;Methylobacterium;30%	0	0	0	1	0	0	0	0	0	0	0	0	0	0	0	0	0	0	0	0	0	0	0	0	0	0	0	0	0	0	0
OTU_21;size=34638;	;Root;100%;Bacteria;100%;"Bacteroidetes";100%;"Bacteroidia";100%;"Bacteroidales";100%;"Porphyromonadaceae";100%;Porphyromonas;98%	912	949	2356	525	330	729	853	444	100	581	63	889	1176	321	887	2170	754	258	126	694	440	262	2487	4918	5074	277	463	781	649	960	5804
OTU_2114;size=18;	;Root;100%;Bacteria;100%;"Acidobacteria";100%;Acidobacteria_Gp4;100%;Gp4;78%	0	0	0	0	0	0	0	0	0	0	0	0	0	0	0	0	0	0	0	0	0	0	2	0	0	0	0	0	0	0	0
OTU_212;size=745;	;Root;100%;Bacteria;100%;"Bacteroidetes";100%;Sphingobacteriia;100%;"Sphingobacteriales";100%;Sphingobacteriaceae;100%;Olivibacter;79%	0	0	0	0	0	0	0	0	0	0	0	0	0	0	0	0	0	0	0	0	0	0	0	0	0	0	0	0	0	0	0
OTU_2129;size=19;	;Root;100%;Bacteria;100%;"Bacteroidetes";96%;Cytophagia;94%;Cytophagales;94%;Cytophagaceae;85%;Rhodocytophaga;65%	0	0	0	0	0	0	0	0	0	0	0	0	0	0	0	0	0	0	0	0	0	0	0	0	0	0	0	0	0	0	0
OTU_213;size=591;	;Root;100%;Bacteria;100%;"Proteobacteria";100%;Gammaproteobacteria;100%;Pasteurellales;100%;Pasteurellaceae;100%;Gallibacterium;52%	0	23	84	0	0	0	0	0	0	0	0	0	0	0	0	0	0	433	0	35	0	0	0	1	0	3	0	121	0	0	1
OTU_214;size=1322;	;Root;100%;Bacteria;100%;"Actinobacteria";100%;Actinobacteria;100%;Actinobacteridae;100%;Actinomycetales;100%;Micrococcineae;100%;Microbacteriaceae;98%;Frondihabitans;63%	0	0	0	0	0	0	0	0	0	0	0	0	0	0	0	0	0	0	0	0	0	0	0	0	0	0	0	0	0	0	0
OTU_2141;size=31;	;Root;100%;Bacteria;100%;"Actinobacteria";100%;Actinobacteria;100%;Actinobacteridae;100%;Actinomycetales;100%;Micromonosporineae;99%;Micromonosporaceae;99%;Asanoa;31%	0	0	0	0	0	0	0	0	0	0	0	1	0	0	0	0	0	0	0	0	0	0	0	0	0	0	0	0	0	0	0
OTU_2147;size=18;	;Root;100%;Bacteria;100%;"Bacteroidetes";100%;"Bacteroidia";100%;"Bacteroidales";100%;"Prevotellaceae";100%;Prevotella;77%	0	0	0	0	2	0	0	0	0	0	0	0	0	0	0	0	0	0	0	0	0	0	11	12	1	0	0	0	0	0	0
OTU_2160;size=27;	;Root;100%;Bacteria;100%;"Actinobacteria";99%;Actinobacteria;99%;Rubrobacteridae;93%;Gaiellales;93%;Gaiellaceae;93%;Gaiella;93%	0	1	0	0	0	0	0	0	0	0	0	0	0	0	0	0	0	0	0	0	0	0	0	0	0	0	0	0	0	0	0
OTU_217;size=1448;	;Root;100%;Bacteria;100%;"Acidobacteria";100%;Acidobacteria_Gp16;100%;Gp16;100%	1	0	0	0	0	0	0	0	0	0	0	0	0	0	0	0	0	0	0	0	0	0	0	0	0	0	0	0	0	0	0
OTU_2170;size=10;	;Root;100%;Bacteria;91%;Firmicutes;26%;Bacilli;13%;Bacillales;13%;Thermoactinomycetaceae 1;9%;Hazenella;1%	0	0	0	0	0	0	0	0	0	0	0	0	0	0	0	0	0	0	0	0	0	0	0	0	0	0	0	0	0	0	0
OTU_2177;size=10;	;Root;100%;Bacteria;100%;Firmicutes;100%;Clostridia;100%;Clostridiales;100%;Clostridiaceae 1;100%;Clostridium sensu stricto;100%	0	0	0	0	0	0	0	0	0	0	0	0	0	2	0	0	1	0	0	0	4	3	0	0	0	0	0	0	0	0	0
OTU_2199;size=23;	;Root;100%;Bacteria;100%;"Proteobacteria";97%;Alphaproteobacteria;97%;Rhodospirillales;97%;Rhodospirillaceae;87%;Skermanella;41%	0	0	0	0	0	0	0	0	0	0	0	0	0	0	0	0	0	0	0	0	0	0	0	0	0	0	0	0	0	0	0
OTU_2219;size=27;	;Root;100%;Bacteria;100%;"Proteobacteria";100%;Alphaproteobacteria;96%;Rhizobiales;58%;Rhodobiaceae;29%;Afifella;18%	0	0	0	0	0	0	0	0	0	0	0	0	0	0	0	0	0	0	0	0	0	2	0	0	0	0	0	0	0	0	0
OTU_222;size=1520;	;Root;100%;Bacteria;100%;"Proteobacteria";100%;Betaproteobacteria;93%;Rhodocyclales;93%;Rhodocyclaceae;93%;Shinella;93%	0	0	0	0	0	0	0	0	0	0	0	0	0	0	0	0	0	0	0	0	2	0	0	0	0	0	0	0	0	0	2
OTU_223;size=546;	;Root;100%;Bacteria;100%;Firmicutes;100%;Clostridia;100%;Clostridiales;100%;Clostridiales_Incertae Sedis XI;98%;Gallicola;86%	5	4	0	36	9	0	0	0	0	12	1	13	67	11	0	0	147	10	8	24	1	14	12	35	61	0	30	0	2	22	113
OTU_224;size=968;	;Root;100%;Bacteria;100%;"Actinobacteria";100%;Actinobacteria;100%;Actinobacteridae;100%;Actinomycetales;100%;Pseudonocardineae;100%;Pseudonocardiaceae;100%;Pseudonocardia;92%	0	0	0	0	0	0	0	0	0	0	0	0	0	0	0	0	0	0	0	0	0	3	0	0	0	1	0	0	0	0	0
OTU_2243;size=12;	;Root;100%;Bacteria;100%;Firmicutes;88%;Erysipelotrichia;87%;Erysipelotrichales;87%;Erysipelotrichaceae;87%;Holdemania;58%	0	0	0	17	0	0	0	0	0	0	0	0	0	0	0	1	0	0	0	0	0	0	0	0	0	0	0	0	0	0	0
OTU_2249;size=9;	;Root;100%;Bacteria;100%;"Verrucomicrobia";71%;Spartobacteria;37%;Spartobacteria_genera_incertae_sedis;33%	0	0	0	0	0	0	0	0	0	0	0	0	0	0	0	0	0	0	0	0	0	0	0	0	0	0	0	0	0	0	0
OTU_2251;size=9;	;Root;100%;Bacteria;100%;Firmicutes;100%;Clostridia;100%;Clostridiales;100%;Clostridiales_Incertae Sedis XI;100%;Anaerococcus;100%	0	0	0	0	0	0	0	0	0	0	0	0	0	0	0	0	0	0	0	0	0	0	0	0	0	0	0	0	0	0	0
OTU_227;size=1224;	;Root;100%;Bacteria;96%;Cyanobacteria/Chloroplast;47%;Chloroplast;46%;Chloroplast;46%;Streptophyta;31%	0	0	0	0	0	0	0	0	0	0	0	0	0	0	0	0	0	0	0	0	0	0	0	0	0	0	0	0	0	0	1
OTU_228;size=896;	;Root;100%;Bacteria;100%;Firmicutes;99%;Clostridia;98%;Clostridiales;98%;Clostridiaceae 1;45%;Anaerosporobacter;45%	0	0	0	0	0	23	63	56	3	28	9	25	33	6	165	117	21	2	0	193	200	88	37	9	1	1	0	1	0	0	0
OTU_2285;size=12;	;Root;100%;Bacteria;100%;"Actinobacteria";100%;Actinobacteria;100%;Actinobacteridae;100%;Actinomycetales;100%;Frankineae;100%;Nakamurellaceae;98%;Nakamurella;98%	0	0	0	0	0	0	0	0	0	0	0	0	0	0	0	0	0	0	0	0	0	0	0	0	0	0	0	0	0	0	0
OTU_2299;size=9;	;Root;100%;Bacteria;100%;"Actinobacteria";100%;Actinobacteria;100%;Actinobacteridae;100%;Bifidobacteriales;99%;Bifidobacteriaceae;99%;Alloscardovia;40%	0	0	0	0	0	0	0	0	0	0	0	0	0	0	0	0	0	0	0	0	0	0	11	0	0	0	2	0	0	0	0
OTU_231;size=701;	;Root;100%;Bacteria;100%;"Proteobacteria";100%;Alphaproteobacteria;100%;Rhodobacterales;100%;Rhodobacteraceae;100%;Rubellimicrobium;62%	0	0	0	0	0	0	0	0	0	0	0	0	0	0	0	0	0	0	0	0	0	0	0	0	0	4	0	0	0	0	0
OTU_232;size=1445;	;Root;100%;Bacteria;100%;"Proteobacteria";100%;Alphaproteobacteria;100%;Sphingomonadales;100%;Sphingomonadaceae;71%;Novosphingobium;68%	0	0	0	0	0	0	0	1	0	0	0	0	1	0	0	0	1	0	0	0	0	0	0	2	0	0	0	0	0	0	0
OTU_2322;size=16;	;Root;100%;Bacteria;100%;"Proteobacteria";100%;Betaproteobacteria;100%;Rhodocyclales;100%;Rhodocyclaceae;100%;Azospira;100%	0	0	0	0	0	0	0	0	0	0	0	0	0	0	0	0	1	0	0	0	0	0	0	0	0	0	0	0	0	0	0
OTU_236;size=2282;	;Root;100%;Bacteria;95%;"Thermodesulfobacteria";5%;Thermodesulfobacteria;5%;Thermodesulfobacteriales;5%;Thermodesulfobacteriaceae;5%;Thermosulfurimonas;5%	1	1	0	0	0	0	0	0	0	0	0	0	0	0	0	0	0	0	0	0	0	0	0	0	0	0	0	0	0	0	0
OTU_2365;size=19;	;Root;100%;Bacteria;100%;"Actinobacteria";100%;Actinobacteria;100%;Actinobacteridae;100%;Actinomycetales;100%;Actinomycineae;98%;Actinomycetaceae;98%;Mobiluncus;97%	1	2	0	0	5	3	8	28	17	0	2	1	14	0	48	62	3	2	0	18	5	0	40	18	74	0	0	0	3	0	16
OTU_2386;size=15;	;Root;100%;Bacteria;100%;"Actinobacteria";100%;Actinobacteria;100%;Actinobacteridae;100%;Actinomycetales;100%;Corynebacterineae;100%;Nocardiaceae;100%;Williamsia;100%	0	0	0	0	0	0	0	0	0	0	0	0	0	0	0	0	0	0	0	0	0	0	0	0	0	0	0	12	0	0	0
OTU_2390;size=87;	;Root;100%;Bacteria;100%;"Proteobacteria";100%;Betaproteobacteria;100%;Burkholderiales;100%;Oxalobacteraceae;98%;Noviherbaspirillum;41%	0	0	0	1	0	0	0	0	0	0	0	1	0	0	0	0	0	0	0	0	2	0	0	0	0	0	0	0	0	0	0
OTU_2392;size=9;	;Root;100%;Bacteria;100%;Firmicutes;100%;Clostridia;100%;Clostridiales;100%;Clostridiales_Incertae Sedis XI;100%;Peptoniphilus;100%	0	0	0	0	0	0	0	0	0	0	0	0	0	0	0	0	0	0	0	0	0	0	0	0	0	0	0	0	0	0	0
OTU_2394;size=9;	;Root;100%;Bacteria;100%;"Actinobacteria";100%;Actinobacteria;100%;Actinobacteridae;100%;Actinomycetales;100%;Corynebacterineae;100%;Corynebacteriaceae;100%;Corynebacterium;100%	43	8	90	26	194	34	44	38	10	5	11	6	16	0	87	38	0	7	0	0	3	2	38	365	424	143	15	21	53	48	426
OTU_2413;size=8;	;Root;100%;Bacteria;100%;"Proteobacteria";80%;Alphaproteobacteria;43%;Rhodospirillales;39%;Rhodospirillaceae;38%;Rhodospirillum;20%	0	0	0	0	0	0	0	0	0	0	0	0	0	0	0	0	0	0	0	0	0	0	0	0	0	0	0	0	0	0	0
OTU_242;size=463;	;Root;100%;Bacteria;100%;Firmicutes;70%;Erysipelotrichia;68%;Erysipelotrichales;68%;Erysipelotrichaceae;68%;Erysipelothrix;33%	1	0	13	8	2	17	24	7	2	9	0	24	14	7	31	14	29	3	6	120	61	46	16	7	29	8	4	14	4	1	37
OTU_2430;size=8;	;Root;100%;Bacteria;100%;"Bacteroidetes";100%;Sphingobacteriia;96%;"Sphingobacteriales";96%;Chitinophagaceae;95%;Flavihumibacter;56%	0	0	0	0	0	0	0	0	0	0	0	0	0	0	0	0	0	0	0	0	0	0	0	0	6	0	0	0	0	0	0
OTU_244;size=3908;	;Root;100%;Bacteria;100%;"Proteobacteria";100%;Alphaproteobacteria;100%;Sphingomonadales;100%;Sphingomonadaceae;100%;Sphingomonas;100%	0	0	0	2	9	0	0	2	0	0	1	0	0	0	9	0	0	0	0	0	0	0	0	6	0	0	0	1	0	0	1
OTU_2484;size=12;	;Root;100%;Bacteria;100%;candidate division WPS-1;84%;WPS-1_genera_incertae_sedis;84%	0	0	0	0	0	0	0	0	0	0	0	0	0	0	0	0	0	0	0	0	0	0	1	0	0	0	0	0	0	0	0
OTU_249;size=502;	;Root;100%;Bacteria;100%;"Bacteroidetes";100%;Sphingobacteriia;100%;"Sphingobacteriales";100%;Chitinophagaceae;100%;Chitinophaga;100%	0	0	0	0	0	0	0	0	0	0	0	0	0	0	0	0	0	0	0	0	0	0	0	0	0	0	0	0	0	0	0
OTU_2505;size=17;	;Root;100%;Bacteria;100%;"Bacteroidetes";100%;Flavobacteriia;100%;"Flavobacteriales";100%;Flavobacteriaceae;100%;Chryseobacterium;100%	0	0	0	0	0	0	0	0	0	0	0	0	0	0	0	0	0	0	0	0	0	0	0	0	0	0	0	3	0	0	0
OTU_251;size=441;	;Root;100%;Bacteria;100%;"Proteobacteria";100%;Gammaproteobacteria;100%;Pasteurellales;100%;Pasteurellaceae;100%;Avibacterium;99%	2	0	0	0	0	0	0	0	0	12	0	0	0	12	0	0	0	0	0	1	0	0	0	0	0	0	0	1	0	11	521
OTU_2515;size=14;	;Root;100%;Bacteria;100%;"Planctomycetes";95%;Planctomycetia;95%;Planctomycetales;95%;Planctomycetaceae;95%;Planctomyces;86%	0	0	0	1	0	0	0	0	0	0	0	0	0	0	0	0	0	0	0	0	0	0	0	0	0	0	0	0	0	0	0
OTU_254;size=445;	;Root;100%;Bacteria;83%;"Bacteroidetes";28%;Flavobacteriia;23%;"Flavobacteriales";23%;Flavobacteriaceae;23%;Leptobacterium;8%	0	0	1	0	0	0	0	0	0	0	0	0	0	0	0	0	0	0	0	0	0	0	0	0	0	0	0	0	0	0	0
OTU_2545;size=14;	;Root;100%;Bacteria;100%;"Proteobacteria";100%;Alphaproteobacteria;100%;Rhizobiales;99%;Beijerinckiaceae;59%;Chelatococcus;59%	0	0	0	0	1	0	0	0	0	0	0	0	0	0	0	0	0	0	0	0	0	0	0	0	0	0	0	0	0	0	0
OTU_2556;size=11;	;Root;100%;Bacteria;100%;Firmicutes;100%;Bacilli;100%;Lactobacillales;100%;Leuconostocaceae;100%;Leuconostoc;100%	0	0	0	0	0	0	0	0	0	0	0	0	0	0	0	0	0	0	0	0	0	0	0	0	0	0	0	0	0	0	0
OTU_2580;size=8;	;Root;100%;Bacteria;90%;Firmicutes;39%;Clostridia;28%;Clostridiales;28%;Clostridiales_Incertae Sedis XI;14%;Parvimonas;9%	0	0	0	0	0	0	1	0	0	0	0	0	0	0	0	0	0	0	0	0	0	0	0	0	0	0	0	0	0	0	0
OTU_262;size=732;	;Root;100%;Bacteria;100%;"Acidobacteria";100%;Acidobacteria_Gp1;100%;Granulicella;100%	0	0	0	0	1	0	0	0	0	0	0	0	0	0	0	0	0	0	0	0	5	0	0	0	1	0	0	0	0	0	0
OTU_2640;size=15;	;Root;100%;Bacteria;94%;Firmicutes;42%;Bacilli;35%;Bacillales;33%;Thermoactinomycetaceae 1;20%;Hazenella;14%	0	0	0	0	0	0	0	0	0	0	0	0	0	0	0	0	0	0	0	0	0	0	0	0	1	0	0	0	0	0	0
OTU_2648;size=7;	;Root;100%;Bacteria;100%;"Actinobacteria";100%;Actinobacteria;100%;Actinobacteridae;100%;Actinomycetales;100%;Corynebacterineae;88%;Corynebacteriaceae;71%;Corynebacterium;70%	0	0	0	0	0	0	0	0	0	1	0	0	5	0	0	0	0	0	0	0	0	0	0	1	0	0	0	0	0	0	0
OTU_267;size=439;	;Root;100%;Bacteria;100%;Firmicutes;80%;Clostridia;77%;Clostridiales;76%;Ruminococcaceae;59%;Saccharofermentans;40%	0	0	0	0	0	17	26	88	3	14	0	0	65	6	0	0	2	16	0	9	0	0	133	2	55	0	0	0	1	6	100
OTU_268;size=491;	;Root;100%;Bacteria;100%;"Proteobacteria";100%;Alphaproteobacteria;100%;Caulobacterales;100%;Caulobacteraceae;100%;Brevundimonas;100%	0	0	0	0	0	0	0	0	0	0	0	0	0	0	0	0	0	0	1	0	0	0	1	0	0	0	0	0	0	0	0
OTU_2686;size=55;	;Root;100%;Bacteria;100%;"Proteobacteria";100%;Alphaproteobacteria;100%;Sphingomonadales;100%;Sphingomonadaceae;99%;Sphingomonas;45%	0	0	1	0	0	0	0	0	0	0	0	0	0	0	0	0	0	0	0	0	0	0	0	0	0	0	0	0	0	0	0
OTU_2694;size=18;	;Root;100%;Bacteria;98%;"Acidobacteria";66%;Acidobacteria_Gp16;66%;Gp16;66%	0	0	0	0	0	0	0	0	0	0	0	0	0	0	0	0	0	0	0	0	0	0	0	0	0	0	0	0	0	0	0
OTU_2695;size=7;	;Root;100%;Bacteria;100%;"Bacteroidetes";99%;"Bacteroidia";99%;"Bacteroidales";99%;"Prevotellaceae";99%;Prevotella;99%	0	0	0	1	1	0	0	0	0	1	0	0	3	0	0	0	0	0	0	0	0	0	0	0	3	0	0	0	0	0	0
OTU_27;size=21406;	;Root;100%;Bacteria;100%;"Bacteroidetes";100%;"Bacteroidia";100%;"Bacteroidales";100%;"Prevotellaceae";98%;Alloprevotella;98%	60	2	518	35	307	1186	810	449	81	751	55	1354	1253	90	223	943	2853	629	51	3198	2081	1003	822	879	48	17	380	420	14	843	1846
OTU_270;size=542;	;Root;100%;Bacteria;100%;"Proteobacteria";100%;Alphaproteobacteria;100%;Rhodobacterales;100%;Rhodobacteraceae;100%;Rubellimicrobium;99%	0	0	1	0	0	0	0	0	0	0	0	0	0	0	0	0	3	0	0	0	0	0	0	0	0	1	0	0	1	0	0
OTU_272;size=1879;	;Root;100%;Bacteria;100%;"Acidobacteria";100%;Acidobacteria_Gp6;100%;Gp6;100%	0	0	0	0	0	0	1	0	0	0	0	0	0	0	0	0	0	0	0	0	0	0	0	0	0	0	0	0	0	0	0
OTU_275;size=648;	;Root;100%;Bacteria;100%;"Proteobacteria";100%;Alphaproteobacteria;100%;Rhizobiales;84%;Methylocystaceae;49%;Methylosinus;15%	0	0	0	0	0	0	0	0	0	1	0	0	1	0	0	0	0	0	0	0	0	0	0	0	0	0	0	0	0	0	0
OTU_2772;size=7;	;Root;100%;Bacteria;99%;Firmicutes;36%;Clostridia;27%;Thermoanaerobacterales;13%;Thermoanaerobacteraceae;11%;Desulfovirgula;3%	0	0	0	0	0	1	0	0	0	0	0	0	0	0	0	0	0	0	0	0	0	0	0	0	0	0	0	0	0	0	0
OTU_28;size=19485;	;Root;100%;Bacteria;100%;"Proteobacteria";100%;Betaproteobacteria;100%;Neisseriales;98%;Neisseriaceae;98%;Kingella;51%	23	1	0	8	0	97	273	37	9	126	35	84	2854	177	854	55	251	226	82	9	15	1	1339	2761	1175	0	11	12	0	783	10209
OTU_2807;size=17;	;Root;100%;Bacteria;100%;"Acidobacteria";100%;Acidobacteria_Gp6;100%;Gp6;100%	0	0	0	0	0	0	0	0	0	0	0	0	0	0	0	0	0	0	0	0	0	0	0	0	0	0	0	0	0	0	0
OTU_2810;size=10;	;Root;100%;Bacteria;100%;"Actinobacteria";100%;Actinobacteria;100%;Actinobacteridae;100%;Actinomycetales;100%;Propionibacterineae;98%;Nocardioidaceae;98%;Nocardioides;81%	0	0	0	0	0	0	0	0	0	0	0	0	0	0	0	0	0	0	0	0	0	0	0	0	0	0	0	0	0	0	0
OTU_282;size=325;	;Root;100%;Bacteria;100%;Firmicutes;100%;Clostridia;100%;Clostridiales;100%;Lachnospiraceae;100%;Lachnoanaerobaculum;68%	0	0	0	3	0	0	1	2	0	32	0	2	11	1	92	0	4	0	0	55	85	13	59	20	0	0	3	0	0	3	3
OTU_283;size=1147;	;Root;100%;Bacteria;100%;"Actinobacteria";100%;Actinobacteria;100%;Actinobacteridae;100%;Actinomycetales;100%;Micrococcineae;100%;Micrococcaceae;100%;Arthrobacter;43%	0	0	0	0	0	0	0	0	0	0	0	0	0	0	0	0	0	0	0	0	0	1	0	0	0	2	0	3	0	0	1
OTU_2832;size=6;	;Root;100%;Bacteria;100%;Firmicutes;100%;Clostridia;100%;Clostridiales;100%;Lachnospiraceae;93%;Butyrivibrio;36%	0	0	0	0	0	0	0	0	0	0	0	0	0	0	0	0	0	0	0	0	0	0	0	3	4	0	0	0	0	0	0
OTU_284;size=331;	;Root;100%;Bacteria;98%;"Tenericutes";80%;Mollicutes;80%;Mycoplasmatales;80%;Mycoplasmataceae;80%;Ureaplasma;80%	5	74	105	14	3	8	3	0	0	24	0	7	0	14	3	30	26	3	10	0	1	20	14	13	0	7	3	12	0	1	0
OTU_287;size=602;	;Root;100%;Bacteria;100%;"Proteobacteria";100%;Alphaproteobacteria;100%;Rhodospirillales;100%;Rhodospirillaceae;100%;Skermanella;100%	0	0	0	1	0	0	0	0	0	0	0	0	0	0	0	0	0	0	0	0	0	0	0	0	0	0	0	0	0	0	0
OTU_288;size=481;	;Root;100%;Bacteria;100%;"Proteobacteria";100%;Alphaproteobacteria;100%;Rhodobacterales;100%;Rhodobacteraceae;100%;Paracoccus;100%	0	0	0	0	0	0	0	0	0	0	0	0	1	0	0	5	0	0	0	0	0	0	0	0	0	2	0	0	0	0	2
OTU_2880;size=6;	;Root;100%;Bacteria;100%;"Chlamydiae";100%;Chlamydiia;100%;Chlamydiales;100%;Parachlamydiaceae;99%;Neochlamydia;87%	0	0	0	0	0	0	0	0	0	0	0	0	1	0	0	0	0	0	0	0	0	0	0	0	0	0	0	0	0	0	0
OTU_2884;size=6;	;Root;100%;Bacteria;100%;"Actinobacteria";100%;Actinobacteria;100%;Actinobacteridae;100%;Actinomycetales;100%;Corynebacterineae;100%;Corynebacteriaceae;100%;Corynebacterium;100%	0	0	0	0	0	0	0	0	0	0	0	0	0	0	0	0	0	0	5	0	0	0	0	0	0	0	0	0	0	0	0
OTU_289;size=559;	;Root;100%;Bacteria;100%;"Proteobacteria";100%;Alphaproteobacteria;100%;Sphingomonadales;100%;Sphingomonadaceae;100%;Sphingomonas;100%	0	0	0	0	0	0	0	0	0	0	0	0	0	0	0	0	0	0	0	0	0	0	3	0	0	0	0	0	0	0	0
OTU_2907;size=12;	;Root;100%;Bacteria;82%;Firmicutes;25%;Clostridia;23%;Clostridiales;21%;Peptococcaceae 1;9%;Desulfonispora;9%	0	0	0	0	1	0	0	0	0	0	0	0	0	0	0	0	0	0	0	0	1	0	0	0	0	0	4	0	0	0	0
OTU_2915;size=6;	;Root;100%;Bacteria;99%;"Proteobacteria";98%;Alphaproteobacteria;98%;Rhodospirillales;98%;Acetobacteraceae;91%;Acidicaldus;52%	0	0	0	0	0	0	0	0	0	0	0	0	0	0	0	0	0	0	0	0	0	0	0	0	0	0	0	0	0	0	0
OTU_296;size=305;	;Root;100%;Bacteria;100%;Firmicutes;93%;Clostridia;89%;Clostridiales;89%;Ruminococcaceae;65%;Saccharofermentans;22%	0	0	8	0	0	10	0	5	1	16	0	3	2	1	0	0	23	2	0	157	20	14	3	18	31	2	1	0	2	6	46
OTU_297;size=370;	;Root;100%;Bacteria;100%;"Proteobacteria";100%;Alphaproteobacteria;100%;Rhizobiales;100%;Methylobacteriaceae;100%;Methylobacterium;100%	0	0	0	0	0	0	0	0	0	0	0	0	0	0	0	0	0	0	0	0	0	0	0	1	0	0	0	0	0	0	0
OTU_300;size=437;	;Root;100%;Bacteria;100%;"Proteobacteria";100%;Alphaproteobacteria;100%;Sphingomonadales;100%;Sphingomonadaceae;100%;Sphingomonas;100%	0	0	0	0	0	0	0	0	0	0	0	0	0	0	1	0	0	0	0	0	0	0	0	0	0	0	0	0	0	0	0
OTU_303;size=971;	;Root;100%;Bacteria;100%;"Actinobacteria";88%;Actinobacteria;83%;Rubrobacteridae;75%;Solirubrobacterales;75%;Solirubrobacteraceae;55%;Solirubrobacter;55%	0	0	0	0	0	0	0	0	0	0	0	0	0	0	0	0	0	0	0	2	0	0	0	0	0	0	0	0	0	0	0
OTU_3049;size=21;	;Root;100%;Bacteria;100%;"Actinobacteria";95%;Actinobacteria;86%;Rubrobacteridae;83%;Solirubrobacterales;51%;Conexibacteraceae;48%;Conexibacter;48%	0	0	0	0	0	0	0	0	0	0	0	0	0	0	0	0	0	0	0	1	0	0	0	0	0	0	0	0	0	0	0
OTU_3056;size=22;	;Root;100%;Bacteria;100%;"Bacteroidetes";100%;Sphingobacteriia;100%;"Sphingobacteriales";100%;Chitinophagaceae;100%;Flavisolibacter;43%	0	0	0	0	0	0	0	0	0	0	0	0	0	0	0	1	0	0	0	0	0	0	0	0	0	0	0	0	0	0	0
OTU_3069;size=17;	;Root;100%;Bacteria;100%;"Actinobacteria";97%;Actinobacteria;96%;Acidimicrobidae;86%;Acidimicrobiales;86%;"Acidimicrobineae";86%;Acidimicrobiaceae;51%;Ferrimicrobium;35%	0	0	0	0	0	0	0	0	0	0	0	0	0	0	0	0	0	0	0	0	0	0	0	0	0	0	0	0	0	0	0
OTU_309;size=765;	;Root;100%;Bacteria;100%;"Proteobacteria";100%;Betaproteobacteria;100%;Burkholderiales;99%;Comamonadaceae;60%;Caldimonas;29%	0	0	0	0	0	0	0	0	0	1	0	0	0	0	0	0	0	0	0	0	1	0	0	0	0	1	0	16	0	0	0
OTU_31;size=26397;	;Root;100%;Bacteria;100%;Firmicutes;100%;Bacilli;100%;Lactobacillales;100%;Streptococcaceae;100%;Streptococcus;100%	0	0	0	1	0	0	0	0	0	0	0	0	0	0	0	0	0	0	0	0	0	0	0	0	0	0	0	0	0	0	0
OTU_311;size=784;	;Root;100%;Bacteria;100%;"Actinobacteria";100%;Actinobacteria;100%;Actinobacteridae;100%;Actinomycetales;100%;Micromonosporineae;100%;Micromonosporaceae;100%;Catenuloplanes;98%	0	0	0	0	0	0	0	0	0	0	0	0	0	0	0	0	0	0	0	0	0	0	0	0	0	0	0	0	0	0	0
OTU_315;size=260;	;Root;100%;Bacteria;100%;"Actinobacteria";100%;Actinobacteria;100%;Actinobacteridae;100%;Actinomycetales;100%;Actinomycineae;91%;Actinomycetaceae;91%;Actinomyces;90%	2	0	5	5	5	1	0	6	2	7	0	0	8	0	22	27	10	1	0	5	8	2	44	1	82	14	11	19	23	3	12
OTU_319;size=279;	;Root;100%;Bacteria;95%;"Acidobacteria";28%;Acidobacteria_Gp16;26%;Gp16;26%	0	0	0	0	0	0	0	0	0	0	0	0	0	0	0	0	0	0	0	0	0	0	0	0	0	0	0	0	0	0	0
OTU_3193;size=5;	;Root;100%;Bacteria;100%;"Actinobacteria";100%;Actinobacteria;100%;Actinobacteridae;100%;Actinomycetales;100%;Corynebacterineae;100%;Corynebacteriaceae;100%;Corynebacterium;100%	0	0	0	0	0	0	0	0	0	0	0	0	0	0	0	0	0	0	0	0	0	0	0	0	0	0	0	0	0	0	0
OTU_32;size=20110;	;Root;100%;Bacteria;99%;Cyanobacteria/Chloroplast;86%;Chloroplast;85%;Chloroplast;85%;Streptophyta;80%	1	0	0	0	0	0	0	0	0	0	0	0	0	0	0	0	0	0	0	0	0	0	0	0	0	0	0	0	0	0	0
OTU_321;size=608;	;Root;100%;Bacteria;100%;"Proteobacteria";100%;Alphaproteobacteria;100%;Rhizobiales;100%;Hyphomicrobiaceae;100%;Devosia;100%	0	0	0	0	0	0	0	0	0	0	0	0	0	0	0	0	0	0	0	0	0	0	0	0	0	0	0	0	0	0	0
OTU_326;size=422;	;Root;100%;Bacteria;100%;"Proteobacteria";100%;Betaproteobacteria;100%;Neisseriales;98%;Neisseriaceae;98%;Alysiella;47%	0	0	1	12	0	0	0	0	0	0	0	0	0	0	0	302	0	2	0	0	0	0	0	0	0	0	0	196	0	0	1
OTU_3276;size=8;	;Root;100%;Bacteria;99%;"Gemmatimonadetes";96%;Gemmatimonadetes;96%;Gemmatimonadales;96%;Gemmatimonadaceae;96%;Gemmatimonas;96%	0	0	0	0	0	0	0	0	0	0	0	0	0	0	0	0	0	0	0	0	0	0	0	0	3	0	0	0	0	0	0
OTU_3301;size=13;	;Root;100%;Bacteria;100%;"Proteobacteria";100%;Alphaproteobacteria;100%;Sphingomonadales;100%;Sphingomonadaceae;100%;Sphingomonas;88%	0	0	0	1	0	0	0	0	0	0	0	0	0	0	0	0	0	0	0	0	0	0	0	0	0	0	0	0	0	0	0
OTU_332;size=270;	;Root;100%;Bacteria;100%;Firmicutes;100%;Bacilli;100%;Lactobacillales;100%;Lactobacillaceae;100%;Lactobacillus;100%	0	0	0	1	0	0	0	0	0	0	0	0	0	0	0	0	90	148	0	0	0	0	0	0	0	0	0	0	0	0	0
OTU_3335;size=5;	;Root;100%;Bacteria;100%;"Bacteroidetes";100%;"Bacteroidia";100%;"Bacteroidales";100%;"Prevotellaceae";100%;Prevotella;91%	0	0	0	0	0	0	0	0	0	0	0	0	0	0	0	0	0	0	0	0	0	0	0	4	5	0	0	0	0	0	0
OTU_334;size=304;	;Root;100%;Bacteria;100%;Firmicutes;100%;Bacilli;100%;Lactobacillales;100%;Streptococcaceae;100%;Streptococcus;100%	0	0	3	0	0	0	0	4	0	0	0	0	0	0	0	57	0	0	0	9	25	6	7	87	0	0	20	4	0	0	85
OTU_3347;size=5;	;Root;100%;Bacteria;100%;Firmicutes;87%;Clostridia;86%;Clostridiales;86%;Lachnospiraceae;73%;Parasporobacterium;14%	0	0	0	0	0	0	0	0	0	0	0	0	0	0	0	0	6	0	0	0	0	0	0	0	0	0	0	0	0	0	0
OTU_337;size=429;	;Root;100%;Bacteria;100%;"Actinobacteria";100%;Actinobacteria;100%;Actinobacteridae;100%;Actinomycetales;100%;Corynebacterineae;100%;Corynebacteriaceae;100%;Corynebacterium;100%	4	39	4	15	7	5	65	50	50	13	3	27	584	1	59	30	139	100	57	203	74	22	109	1	58	0	2	60	17	6	245
OTU_34;size=43266;	;Root;100%;Bacteria;90%;"Proteobacteria";26%;Gammaproteobacteria;17%;Cardiobacteriales;1%;Cardiobacteriaceae;1%;Dichelobacter;1%	0	0	1	0	0	0	0	1	0	0	0	0	1	0	0	1	0	0	1	0	0	0	0	0	1	0	0	0	0	0	0
OTU_3416;size=5;	;Root;100%;Bacteria;100%;Firmicutes;100%;Clostridia;100%;Clostridiales;100%;Peptostreptococcaceae;100%;Clostridium XI;100%	0	0	0	0	0	0	0	1	0	0	0	0	0	0	0	0	0	0	2	0	1	1	0	0	0	0	0	0	0	0	0
OTU_342;size=521;	;Root;100%;Bacteria;100%;"Chloroflexi";69%;Anaerolineae;49%;Anaerolineales;49%;Anaerolineaceae;49%;Bellilinea;24%	0	0	0	0	0	0	0	0	0	0	0	0	0	0	0	0	0	0	0	0	0	0	15	0	0	0	0	0	0	0	0
OTU_344;size=312;	;Root;100%;Bacteria;100%;"Actinobacteria";100%;Actinobacteria;100%;Actinobacteridae;100%;Actinomycetales;100%;Micrococcineae;100%;Micrococcaceae;100%;Micrococcus;100%	0	4	0	0	7	1	5	1	1	2	4	0	24	0	1	0	3	0	4	4	5	24	1	0	152	0	1	0	1	1	57
OTU_346;size=422;	;Root;100%;Bacteria;100%;Firmicutes;100%;Bacilli;100%;Lactobacillales;99%;Lactobacillaceae;99%;Lactobacillus;97%	0	0	0	11	0	0	0	0	0	7	0	8	2	0	2	0	304	165	0	0	0	0	8	0	0	1	3	4	0	0	0
OTU_347;size=717;	;Root;100%;Bacteria;100%;"Bacteroidetes";100%;Sphingobacteriia;100%;"Sphingobacteriales";100%;Chitinophagaceae;100%;Terrimonas;31%	0	0	0	0	0	0	0	0	0	0	0	0	0	0	0	0	0	0	0	0	0	0	3	0	0	0	0	0	0	0	0
OTU_3475;size=5;	;Root;100%;Bacteria;100%;Firmicutes;100%;Bacilli;100%;Lactobacillales;100%;Lactobacillaceae;81%;Lactobacillus;74%	0	0	0	0	0	0	0	0	0	0	1	0	0	0	0	3	0	2	0	0	3	0	0	0	0	0	0	0	0	0	0
OTU_3478;size=5;	;Root;100%;Bacteria;99%;"Acidobacteria";77%;Acidobacteria_Gp16;75%;Gp16;75%	0	0	0	1	0	0	0	0	0	0	0	0	0	0	0	0	0	0	0	0	0	0	0	0	0	0	0	0	0	0	0
OTU_348;size=609;	;Root;100%;Bacteria;100%;"Proteobacteria";100%;Gammaproteobacteria;100%;Xanthomonadales;100%;Xanthomonadaceae;100%;Pseudoxanthomonas;97%	0	0	0	0	0	0	0	0	0	0	0	0	0	0	0	0	0	0	0	0	0	0	0	0	1	0	0	0	0	0	0
OTU_35;size=13164;	;Root;100%;Bacteria;94%;"Bacteroidetes";16%;"Bacteroidia";8%;"Bacteroidales";8%;Bacteroidaceae;4%;Anaerorhabdus;4%	0	0	0	0	0	1	0	0	0	0	0	0	0	0	0	0	0	0	0	0	0	0	0	0	0	0	0	0	0	0	0
OTU_351;size=975;	;Root;100%;Bacteria;100%;"Proteobacteria";100%;Betaproteobacteria;100%;Rhodocyclales;85%;Rhodocyclaceae;85%;Azoarcus;60%	0	0	0	0	0	0	0	0	0	1	0	0	0	0	0	0	0	0	0	0	0	0	0	0	0	0	0	0	0	0	0
OTU_357;size=259;	;Root;100%;Bacteria;100%;"Proteobacteria";100%;Alphaproteobacteria;100%;Rhizobiales;95%;Phyllobacteriaceae;93%;Mesorhizobium;73%	0	0	0	0	0	0	0	0	0	0	0	0	0	0	0	0	0	0	0	0	0	0	0	0	0	0	0	0	0	0	2
OTU_358;size=971;	;Root;100%;Bacteria;100%;"Acidobacteria";99%;Acidobacteria_Gp6;99%;Gp6;99%	0	0	0	0	1	0	0	0	0	0	0	0	0	0	0	0	0	0	0	0	0	2	0	0	0	0	0	1	0	0	0
OTU_359;size=256;	;Root;100%;Bacteria;100%;"Bacteroidetes";100%;Cytophagia;100%;Cytophagales;100%;Cytophagaceae;100%;Dyadobacter;100%	0	0	0	0	1	0	0	0	0	0	0	0	0	0	0	0	0	0	0	0	0	0	0	0	0	0	0	0	0	0	0
OTU_3598;size=8;	;Root;100%;Bacteria;100%;"Proteobacteria";100%;Alphaproteobacteria;100%;Sphingomonadales;94%;Sphingomonadaceae;92%;Sphingomonas;66%	0	0	0	0	0	0	0	0	0	0	0	0	0	0	0	0	0	0	0	0	0	0	0	0	1	0	0	0	0	0	0
OTU_36;size=43993;	;Root;100%;Bacteria;100%;"Actinobacteria";100%;Actinobacteria;100%;Actinobacteridae;100%;Actinomycetales;100%;Corynebacterineae;100%;Corynebacteriaceae;100%;Corynebacterium;100%	147	71	307	105	668	354	541	540	116	1085	119	186	1381	78	809	891	347	243	123	2600	1052	185	834	915	1841	289	258	503	316	484	3765
OTU_3615;size=4;	;Root;100%;Bacteria;97%;"Proteobacteria";61%;Deltaproteobacteria;19%;Syntrophobacterales;9%;Syntrophobacteraceae;9%;Desulfoglaeba;9%	0	0	0	0	0	0	0	0	0	0	0	0	0	0	0	0	0	0	0	0	0	0	0	0	0	0	0	0	0	0	0
OTU_363;size=525;	;Root;100%;Bacteria;100%;"Proteobacteria";100%;Gammaproteobacteria;100%;Pseudomonadales;100%;Moraxellaceae;100%;Acinetobacter;100%	0	0	0	0	0	0	0	0	0	0	0	0	0	0	0	0	0	0	0	0	0	0	0	0	0	0	0	0	0	0	0
OTU_3634;size=4;	;Root;100%;Bacteria;100%;"Gemmatimonadetes";99%;Gemmatimonadetes;99%;Gemmatimonadales;99%;Gemmatimonadaceae;99%;Gemmatimonas;99%	0	0	0	0	0	0	0	0	0	0	0	0	0	0	0	0	0	0	0	0	0	0	0	0	0	0	0	0	0	0	0
OTU_364;size=633;	;Root;100%;Bacteria;100%;"Proteobacteria";100%;Alphaproteobacteria;100%;Caulobacterales;95%;Caulobacteraceae;95%;Phenylobacterium;95%	0	0	0	0	0	0	0	0	0	0	0	0	0	0	0	0	0	0	0	0	0	0	0	0	0	0	0	0	0	0	0
OTU_367;size=1927;	;Root;100%;Bacteria;100%;"Proteobacteria";100%;Alphaproteobacteria;100%;Sphingomonadales;100%;Sphingomonadaceae;100%;Sphingomonas;61%	0	0	0	0	0	0	0	0	0	0	0	0	0	0	0	0	0	0	0	0	0	0	5	0	0	1	0	0	0	0	0
OTU_3677;size=4;	;Root;100%;Bacteria;100%;Firmicutes;90%;Bacilli;90%;Bacillales;89%;Planococcaceae;23%;Paenisporosarcina;4%	0	0	0	0	0	0	0	0	0	0	0	0	0	0	0	0	0	0	0	0	0	0	0	0	0	1	0	0	0	0	0
OTU_3680;size=4;	;Root;100%;Bacteria;100%;Firmicutes;94%;Erysipelotrichia;86%;Erysipelotrichales;86%;Erysipelotrichaceae;86%;Bulleidia;69%	0	0	0	0	0	0	0	0	0	0	0	0	0	0	0	0	5	0	0	0	0	0	0	0	0	0	0	0	0	0	0
OTU_37;size=12863;	;Root;100%;Bacteria;100%;"Bacteroidetes";100%;"Bacteroidia";100%;"Bacteroidales";100%;Bacteroidaceae;100%;Bacteroides;100%	58	14	10	70	46	152	208	437	67	209	38	232	866	53	94	283	506	210	21	814	337	170	1877	316	2245	503	80	241	400	503	3211
OTU_371;size=194;	;Root;100%;Bacteria;99%;Firmicutes;96%;Clostridia;94%;Clostridiales;94%;Ruminococcaceae;80%;Saccharofermentans;77%	0	0	0	0	1	6	5	5	0	18	1	19	109	1	0	0	7	36	1	0	0	0	0	0	0	0	0	0	2	8	1
OTU_373;size=195;	;Root;100%;Bacteria;100%;"Proteobacteria";100%;Alphaproteobacteria;100%;Rhizobiales;100%;Methylobacteriaceae;100%;Methylobacterium;100%	1	0	1	1	3	3	1	4	1	1	7	0	1	1	8	8	7	1	0	13	5	0	6	4	3	3	1	1	0	0	3
OTU_374;size=963;	;Root;100%;Bacteria;100%;"Acidobacteria";100%;Acidobacteria_Gp10;100%;Gp10;100%	0	0	0	0	0	0	0	0	0	0	0	0	0	0	0	0	0	0	0	0	0	0	0	0	0	0	0	0	0	0	0
OTU_378;size=373;	;Root;100%;Bacteria;100%;"Proteobacteria";95%;Alphaproteobacteria;90%;Rhodospirillales;89%;Acetobacteraceae;58%;Humitalea;8%	0	0	0	0	0	0	0	0	0	0	0	0	0	0	0	0	0	0	0	0	0	0	0	0	0	0	0	0	0	0	0
OTU_3783;size=4;	;Root;100%;Bacteria;100%;Firmicutes;99%;Clostridia;98%;Clostridiales;98%;Lachnospiraceae;98%;Butyrivibrio;72%	0	0	0	0	0	0	0	0	0	0	0	0	0	0	0	0	0	0	0	0	0	0	0	1	5	0	0	0	0	0	0
OTU_3785;size=4;	;Root;100%;Bacteria;100%;"Planctomycetes";95%;Planctomycetia;95%;Planctomycetales;95%;Planctomycetaceae;95%;Telmatocola;19%	0	0	0	0	0	0	0	0	0	0	0	0	0	0	0	0	0	0	0	0	0	0	0	0	0	0	1	0	0	0	0
OTU_38;size=12400;	;Root;100%;Bacteria;99%;"Bacteroidetes";84%;"Bacteroidetes"_incertae_sedis;20%;Marinifilum;20%	16	0	14	31	7	224	577	369	63	511	36	189	620	70	1493	2043	980	281	21	1931	1011	634	848	413	143	0	31	44	6	45	1086
OTU_380;size=561;	;Root;100%;Bacteria;100%;"Proteobacteria";100%;Gammaproteobacteria;100%;Xanthomonadales;100%;Xanthomonadaceae;100%;Luteimonas;65%	0	0	0	0	0	0	0	0	0	0	0	0	0	0	0	0	0	0	0	0	0	0	1	0	0	0	0	0	0	0	0
OTU_382;size=555;	;Root;100%;Bacteria;100%;"Actinobacteria";100%;Actinobacteria;100%;Actinobacteridae;100%;Actinomycetales;100%;Frankineae;65%;Geodermatophilaceae;43%;Blastococcus;37%	0	0	0	1	0	0	0	0	0	0	0	0	0	0	0	0	11	0	0	0	0	0	0	0	0	1	0	0	0	0	4
OTU_3825;size=4;	;Root;100%;Bacteria;100%;"Actinobacteria";100%;Actinobacteria;100%;Actinobacteridae;100%;Actinomycetales;100%;Micrococcineae;98%;Cellulomonadaceae;77%;Cellulomonas;77%	0	0	0	0	1	0	0	0	0	0	0	0	0	0	0	0	0	0	0	0	0	0	0	0	0	0	0	0	0	0	0
OTU_383;size=202;	;Root;100%;Bacteria;100%;"Proteobacteria";100%;Betaproteobacteria;98%;Rhodocyclales;39%;Rhodocyclaceae;39%;Methyloversatilis;13%	0	0	0	0	0	0	0	0	0	0	0	0	0	0	0	0	0	0	0	0	0	0	0	0	0	0	0	0	0	0	0
OTU_3842;size=4;	;Root;100%;Bacteria;100%;"Bacteroidetes";100%;Cytophagia;96%;Cytophagales;96%;Cytophagaceae;90%;Hymenobacter;77%	0	0	0	0	0	0	0	0	0	0	0	0	0	0	0	0	0	0	0	0	0	0	0	0	0	0	0	0	0	0	0
OTU_3858;size=4;	;Root;100%;Bacteria;86%;"Deferribacteres";5%;Deferribacteres;5%;Deferribacterales;5%;Deferribacteraceae;5%;Mucispirillum;5%	0	0	0	0	0	0	0	0	0	0	0	0	0	0	0	0	0	0	0	0	0	0	0	0	0	0	0	0	0	0	0
OTU_386;size=376;	;Root;100%;Bacteria;100%;"Acidobacteria";99%;Acidobacteria_Gp6;99%;Gp6;99%	0	0	0	0	0	0	0	0	0	0	4	0	0	0	0	0	0	0	0	0	0	0	0	0	0	0	0	0	0	0	0
OTU_389;size=246;	;Root;100%;Bacteria;100%;"Actinobacteria";100%;Actinobacteria;100%;Actinobacteridae;100%;Actinomycetales;100%;Corynebacterineae;100%;Corynebacteriaceae;100%;Corynebacterium;100%	0	0	0	0	0	0	0	0	0	0	0	0	0	0	0	0	0	0	0	0	0	0	0	0	0	0	0	0	0	0	0
OTU_3892;size=4;	;Root;100%;Bacteria;99%;"Bacteroidetes";87%;Cytophagia;60%;Cytophagales;60%;Cytophagaceae;49%;Adhaeribacter;24%	0	0	0	0	1	0	0	0	0	0	0	0	0	0	0	0	0	0	0	0	0	0	0	0	0	0	0	0	0	0	0
OTU_39;size=11773;	;Root;100%;Bacteria;100%;Firmicutes;100%;Bacilli;100%;Bacillales;100%;Bacillales_Incertae Sedis XI;99%;Gemella;99%	300	735	566	759	612	377	330	106	87	173	0	423	109	214	497	603	1425	153	1948	470	242	145	59	1011	35	99	166	276	44	275	447
OTU_3963;size=4;	;Root;100%;Bacteria;96%;"Acidobacteria";39%;Acidobacteria_Gp16;39%;Gp16;39%	0	0	0	0	0	0	0	0	0	0	0	0	0	0	0	0	0	4	0	0	0	0	0	0	0	0	0	0	0	0	0
OTU_40;size=16389;	;Root;100%;Bacteria;100%;Firmicutes;100%;Bacilli;100%;Lactobacillales;100%;Lactobacillaceae;100%;Lactobacillus;100%	0	0	0	0	0	0	0	0	0	0	0	0	0	0	0	0	16	19	0	0	0	0	0	0	0	0	0	0	0	0	0
OTU_401;size=365;	;Root;100%;Bacteria;100%;"Proteobacteria";100%;Alphaproteobacteria;100%;Rhizobiales;98%;Beijerinckiaceae;56%;Beijerinckia;44%	0	0	0	0	12	0	0	0	0	0	0	0	0	0	0	0	1	0	0	0	0	0	0	0	0	0	0	0	0	0	0
OTU_4034;size=4;	;Root;100%;Bacteria;100%;"Fusobacteria";99%;Fusobacteriia;99%;"Fusobacteriales";99%;"Leptotrichiaceae";99%;Leptotrichia;66%	0	0	0	4	0	0	0	0	0	0	0	0	0	0	0	0	0	0	0	0	0	0	0	0	0	0	0	0	0	0	0
OTU_4037;size=7;	;Root;100%;Bacteria;99%;"Proteobacteria";86%;Alphaproteobacteria;76%;Alphaproteobacteria_incertae_sedis;20%;Geminicoccus;20%	0	0	0	0	0	0	0	0	0	0	0	0	0	0	0	0	0	1	0	0	0	0	0	0	0	0	0	0	0	0	0
OTU_407;size=815;	;Root;100%;Archaea;100%;"Thaumarchaeota";100%;Nitrososphaerales;100%;Nitrososphaeraceae;100%;Nitrososphaera;100%	0	0	0	0	0	0	0	0	0	0	0	0	0	0	0	0	0	0	0	0	0	0	0	0	0	0	0	0	0	0	0
OTU_4090;size=15;	;Root;100%;Bacteria;100%;"Actinobacteria";100%;Actinobacteria;100%;Actinobacteridae;100%;Actinomycetales;100%;Frankineae;100%;Geodermatophilaceae;100%;Geodermatophilus;89%	0	0	0	0	0	0	0	0	0	0	0	0	0	0	0	0	0	0	0	0	0	0	0	0	0	0	0	0	0	0	0
OTU_4139;size=3;	;Root;100%;Bacteria;100%;"Caldiserica";14%;Caldisericia;14%;Caldisericales;14%;Caldisericaceae;14%;Caldisericum;14%	0	0	0	0	0	0	0	0	0	0	0	0	0	0	0	0	0	0	0	0	0	0	0	0	0	0	0	0	0	0	0
OTU_4150;size=3;	;Root;100%;Bacteria;100%;"Verrucomicrobia";100%;Opitutae;100%;Opitutales;100%;Opitutaceae;100%;Opitutus;95%	0	0	0	0	0	0	0	0	0	0	0	0	0	0	0	0	0	0	0	0	0	2	0	0	0	0	0	0	0	0	0
OTU_417;size=1138;	;Root;100%;Bacteria;100%;"Actinobacteria";100%;Actinobacteria;100%;Actinobacteridae;100%;Actinomycetales;100%;Propionibacterineae;100%;Nocardioidaceae;97%;Nocardioides;58%	0	0	0	0	0	0	0	0	0	0	0	0	0	0	0	0	0	0	0	0	0	0	0	0	0	0	0	0	0	0	0
OTU_418;size=512;	;Root;100%;Bacteria;100%;"Armatimonadetes";97%;Armatimonadia;97%;Armatimonadales;97%;Armatimonadaceae;97%;Armatimonas/Armatimonadetes_gp1;97%	0	0	0	0	0	0	0	0	0	0	0	0	0	0	0	0	0	0	0	0	1	0	0	0	0	0	0	0	0	0	0
OTU_4180;size=3;	;Root;100%;Bacteria;100%;"Bacteroidetes";97%;Cytophagia;49%;Cytophagales;49%;Flammeovirgaceae;25%;Marinoscillum;22%	0	0	0	0	0	0	0	0	0	0	0	0	0	0	0	3	0	0	0	0	0	0	0	0	0	0	0	0	0	0	0
OTU_42;size=12465;	;Root;100%;Bacteria;94%;"Proteobacteria";34%;Gammaproteobacteria;18%;Xanthomonadales;10%;Xanthomonadaceae;10%;Silanimonas;3%	1	0	0	0	0	0	0	0	0	0	0	0	0	0	0	0	0	0	0	0	0	0	0	0	0	0	0	0	0	0	0
OTU_420;size=195;	;Root;100%;Bacteria;100%;"Proteobacteria";100%;Alphaproteobacteria;99%;Rhodospirillales;90%;Rhodospirillaceae;82%;Skermanella;52%	0	0	0	0	0	0	0	0	0	0	0	0	0	0	0	0	0	0	0	0	0	0	0	0	0	0	0	0	0	0	0
OTU_423;size=185;	;Root;100%;Bacteria;100%;"Verrucomicrobia";97%;Opitutae;97%;Opitutales;97%;Opitutaceae;97%;Opitutus;96%	0	0	0	0	0	0	0	0	0	0	0	0	0	0	0	0	0	0	0	0	0	0	0	0	0	0	0	0	0	0	0
OTU_426;size=241;	;Root;100%;Bacteria;100%;Firmicutes;99%;Clostridia;99%;Clostridiales;99%;Ruminococcaceae;92%;Acetivibrio;28%	0	0	0	0	0	8	4	34	2	12	1	9	38	2	29	42	0	4	14	38	3	0	25	1	0	1	2	0	1	2	15
OTU_43;size=14047;	;Root;100%;Bacteria;94%;"Chloroflexi";15%;Anaerolineae;10%;Anaerolineales;10%;Anaerolineaceae;10%;Leptolinea;9%	0	0	0	0	0	0	0	0	0	0	0	0	0	0	1	0	1	0	0	2	0	0	0	0	0	0	0	0	0	0	0
OTU_430;size=166;	;Root;100%;Bacteria;100%;"Proteobacteria";100%;Betaproteobacteria;100%;Methylophilales;100%;Methylophilaceae;100%;Methylophilus;100%	0	0	0	0	0	0	0	0	0	0	0	0	0	0	0	0	0	0	0	0	0	2	0	0	0	0	0	0	0	0	0
OTU_431;size=615;	;Root;100%;Bacteria;100%;"Proteobacteria";95%;Betaproteobacteria;64%;Rhodocyclales;23%;Rhodocyclaceae;23%;Sulfuritalea;21%	0	0	0	0	0	0	0	0	0	0	0	0	0	0	0	0	1	0	0	0	0	0	0	0	0	0	0	0	0	0	0
OTU_4358;size=6;	;Root;100%;Bacteria;100%;"Bacteroidetes";100%;Sphingobacteriia;99%;"Sphingobacteriales";99%;Chitinophagaceae;98%;Flavisolibacter;56%	0	0	0	0	0	0	0	0	0	0	0	0	0	0	0	0	0	0	0	0	0	0	0	1	0	0	0	0	0	0	0
OTU_437;size=161;	;Root;100%;Bacteria;100%;Firmicutes;98%;Clostridia;96%;Clostridiales;96%;Ruminococcaceae;89%;Saccharofermentans;38%	1	1	10	0	12	0	0	1	0	0	0	1	4	0	2	1	11	2	1	5	7	0	28	3	70	0	1	0	6	4	18
OTU_4391;size=6;	;Root;100%;Bacteria;100%;"Proteobacteria";100%;Alphaproteobacteria;100%;Rhodospirillales;99%;Acetobacteraceae;97%;Belnapia;40%	0	0	0	0	0	0	0	0	0	0	0	0	0	0	0	0	0	0	0	2	0	0	0	0	0	0	0	0	0	0	0
OTU_440;size=156;	;Root;100%;Bacteria;100%;"Bacteroidetes";100%;Flavobacteriia;100%;"Flavobacteriales";100%;Flavobacteriaceae;100%;Riemerella;100%	0	0	0	0	0	0	0	0	0	0	0	0	0	0	0	0	0	0	0	0	0	0	0	1	0	8	0	0	0	0	188
OTU_441;size=529;	;Root;100%;Bacteria;100%;Firmicutes;100%;Bacilli;100%;Bacillales;100%;Planococcaceae;94%;Sporosarcina;92%	0	0	0	0	0	0	0	0	0	0	0	0	0	0	0	0	0	0	0	0	6	0	0	0	0	0	1	0	0	0	0
OTU_442;size=292;	;Root;100%;Bacteria;100%;"Proteobacteria";100%;Gammaproteobacteria;97%;Xanthomonadales;28%;Sinobacteraceae;26%;Steroidobacter;24%	0	0	1	0	0	0	0	0	0	0	0	0	0	0	0	0	0	0	0	0	0	0	0	0	0	0	0	0	0	0	0
OTU_446;size=894;	;Root;100%;Bacteria;100%;"Actinobacteria";100%;Actinobacteria;100%;Actinobacteridae;100%;Actinomycetales;100%;Micrococcineae;100%;Cellulomonadaceae;100%;Cellulomonas;100%	0	0	0	0	0	0	0	0	0	0	0	0	0	0	0	0	0	0	0	0	5	0	0	0	0	1	0	0	0	0	0
OTU_4475;size=3;	;Root;100%;Bacteria;97%;SR1;55%;SR1_genera_incertae_sedis;55%	0	0	0	0	0	0	0	0	0	0	0	0	0	0	0	0	0	0	0	0	0	0	0	0	0	0	0	0	0	0	0
OTU_4476;size=12;	;Root;100%;Bacteria;100%;"Proteobacteria";100%;Alphaproteobacteria;99%;Rhizobiales;99%;Rhizobiaceae;97%;Rhizobium;97%	0	0	0	0	0	0	0	0	0	0	0	0	0	0	0	0	0	0	0	0	0	0	0	1	0	0	0	0	0	0	0
OTU_4484;size=3;	;Root;100%;Bacteria;99%;"Acidobacteria";68%;Acidobacteria_Gp16;68%;Gp16;68%	0	0	0	0	0	0	0	0	0	0	0	0	0	0	0	0	0	0	0	0	0	0	0	0	0	0	0	0	0	0	0
OTU_45;size=10080;	;Root;100%;Bacteria;100%;"Bacteroidetes";100%;"Bacteroidia";100%;"Bacteroidales";100%;"Porphyromonadaceae";100%;Porphyromonas;55%	97	25	21	178	60	26	28	32	11	92	4	52	465	19	16	95	25	14	0	119	100	15	1586	185	3869	82	23	120	417	241	3065
OTU_4533;size=3;	;Root;100%;Bacteria;98%;"Thermodesulfobacteria";9%;Thermodesulfobacteria;9%;Thermodesulfobacteriales;9%;Thermodesulfobacteriaceae;9%;Caldimicrobium;9%	0	0	0	0	0	0	0	0	0	0	0	0	0	0	0	0	0	0	0	0	0	0	0	1	0	0	0	2	0	0	0
OTU_454;size=239;	;Root;100%;Bacteria;100%;Firmicutes;100%;Bacilli;100%;Bacillales;100%;Bacillaceae 2;100%;Virgibacillus;88%	0	0	0	0	0	0	0	0	0	0	0	0	0	0	0	0	0	0	0	0	0	0	0	1	0	0	0	0	0	0	1
OTU_4556;size=9;	;Root;100%;Bacteria;100%;"Actinobacteria";92%;Actinobacteria;87%;Rubrobacteridae;86%;Solirubrobacterales;84%;Conexibacteraceae;70%;Conexibacter;70%	0	0	0	0	0	0	0	0	0	0	0	0	0	0	0	0	0	0	0	0	0	0	0	0	0	0	0	0	0	0	0
OTU_4573;size=3;	;Root;100%;Bacteria;100%;Firmicutes;100%;Bacilli;100%;Lactobacillales;100%;Lactobacillaceae;99%;Lactobacillus;99%	0	0	0	2	0	0	0	0	0	0	0	0	0	0	0	0	0	1	0	0	0	0	0	0	0	0	0	0	0	0	0
OTU_4599;size=3;	;Root;100%;Bacteria;98%;"Planctomycetes";95%;Planctomycetia;95%;Planctomycetales;95%;Planctomycetaceae;95%;Aquisphaera;43%	0	0	0	0	0	0	0	0	0	0	0	0	0	0	0	0	0	0	0	0	0	0	1	0	0	0	0	0	0	0	0
OTU_46;size=12799;	;Root;100%;Bacteria;97%;Cyanobacteria/Chloroplast;72%;Chloroplast;69%;Chloroplast;69%;Streptophyta;64%	0	0	0	0	0	0	0	0	0	0	0	0	0	0	0	0	0	0	0	0	0	1	0	0	1	0	0	0	0	1	0
OTU_462;size=138;	;Root;100%;Bacteria;100%;Firmicutes;86%;Clostridia;82%;Clostridiales;82%;Eubacteriaceae;56%;Eubacterium;55%	1	0	0	0	0	5	3	2	2	0	0	0	16	0	16	0	22	5	0	24	2	0	2	1	57	0	0	7	0	0	12
OTU_464;size=280;	;Root;100%;Bacteria;83%;"Bacteroidetes";25%;Flavobacteriia;19%;"Flavobacteriales";19%;Flavobacteriaceae;18%;Leptobacterium;8%	0	0	0	0	0	0	0	0	0	0	0	0	0	0	0	0	0	0	0	0	0	0	0	1	0	0	0	0	0	0	0
OTU_4648;size=3;	;Root;100%;Bacteria;100%;"Proteobacteria";100%;Alphaproteobacteria;100%;Sphingomonadales;96%;Sphingomonadaceae;96%;Sphingosinicella;42%	0	0	0	0	0	0	0	0	0	0	0	0	0	0	0	0	0	0	0	0	0	0	0	0	0	0	0	0	0	0	0
OTU_4666;size=3;	;Root;100%;Bacteria;100%;"Bacteroidetes";100%;Sphingobacteriia;100%;"Sphingobacteriales";100%;Chitinophagaceae;100%;Segetibacter;95%	0	0	0	0	0	0	0	0	0	0	0	0	0	0	0	0	0	0	0	0	0	0	0	0	0	0	0	0	0	0	0
OTU_468;size=865;	;Root;100%;Bacteria;100%;"Actinobacteria";100%;Actinobacteria;100%;Actinobacteridae;100%;Actinomycetales;100%;Propionibacterineae;100%;Nocardioidaceae;100%;Nocardioides;100%	0	1	0	0	0	0	0	0	0	0	0	0	0	0	0	0	0	0	0	0	0	0	0	0	0	0	0	0	0	0	0
OTU_47;size=9582;	;Root;100%;Bacteria;100%;Firmicutes;100%;Clostridia;100%;Clostridiales;100%;Clostridiales_Incertae Sedis XI;62%;Peptoniphilus;48%	61	40	195	36	199	77	118	159	34	230	35	125	993	53	370	290	277	118	40	273	144	58	347	413	2128	290	128	235	455	269	2186
OTU_471;size=153;	;Root;100%;Bacteria;100%;Firmicutes;100%;Clostridia;100%;Clostridiales;100%;Clostridiales_Incertae Sedis XIII;100%;Mogibacterium;100%	0	0	1	1	0	6	7	26	0	19	0	2	26	2	0	0	20	2	10	16	4	1	2	1	0	0	0	8	0	3	25
OTU_4714;size=60;	;Root;100%;Bacteria;100%;"Actinobacteria";100%;Actinobacteria;100%;Actinobacteridae;100%;Actinomycetales;100%;Corynebacterineae;98%;Corynebacteriaceae;97%;Corynebacterium;96%	66	40	17	84	355	196	138	107	48	70	3	29	431	29	556	977	0	6	0	216	72	76	290	278	2778	374	282	561	185	137	1028
OTU_4715;size=3;	;Root;100%;Bacteria;100%;"Proteobacteria";100%;Alphaproteobacteria;100%;Rhizobiales;91%;"Aurantimonadaceae";86%;Aurantimonas;71%	0	0	0	0	0	0	0	0	0	0	0	0	0	0	0	0	0	0	0	0	0	0	0	1	0	0	0	0	0	0	0
OTU_473;size=5254;	;Root;100%;Bacteria;94%;"Proteobacteria";45%;Alphaproteobacteria;22%;Rhodospirillales;8%;Acetobacteraceae;7%;Rubritepida;6%	0	0	1	0	0	0	0	0	0	0	0	0	0	0	0	0	0	0	0	0	0	0	0	0	0	0	0	0	0	0	0
OTU_4732;size=3;	;Root;100%;Bacteria;100%;"Proteobacteria";92%;Alphaproteobacteria;76%;Alphaproteobacteria_incertae_sedis;30%;Geminicoccus;29%	0	0	0	0	0	0	0	0	0	0	0	0	0	0	0	0	0	0	0	0	0	0	0	0	0	0	0	0	0	0	0
OTU_4747;size=3;	;Root;100%;Bacteria;100%;"Proteobacteria";100%;Deltaproteobacteria;100%;Desulfuromonadales;100%;Desulfuromonadaceae;97%;Pelobacter;61%	0	0	0	0	0	0	0	0	0	0	0	0	0	0	0	0	0	0	0	0	0	0	0	0	0	0	0	3	0	0	0
OTU_476;size=428;	;Root;100%;Bacteria;100%;"Actinobacteria";100%;Actinobacteria;100%;Actinobacteridae;100%;Actinomycetales;100%;Kineosporiineae;100%;Kineosporiaceae;100%;Kineococcus;100%	0	0	0	0	0	0	0	0	0	0	0	0	0	0	0	0	0	0	0	0	0	0	0	1	0	3	0	0	0	0	0
OTU_478;size=244;	;Root;100%;Bacteria;100%;"Proteobacteria";100%;Betaproteobacteria;100%;Rhodocyclales;96%;Rhodocyclaceae;96%;Azoarcus;49%	0	0	0	0	0	0	0	0	0	0	0	0	0	0	1	0	0	0	0	0	0	0	0	0	0	0	0	0	0	0	0
OTU_4794;size=3;	;Root;100%;Bacteria;100%;"Bacteroidetes";100%;Cytophagia;100%;Cytophagales;100%;Cytophagaceae;100%;Pontibacter;100%	0	0	0	0	0	0	0	0	0	0	0	0	0	0	0	0	0	1	0	0	0	0	0	0	0	0	0	0	0	0	0
OTU_4801;size=3;	;Root;100%;Bacteria;100%;"Deinococcus-Thermus";99%;Deinococci;99%;Deinococcales;99%;Deinococcaceae;99%;Deinococcus;97%	0	0	0	0	0	0	0	0	0	0	0	0	0	0	0	0	0	0	0	0	0	0	0	0	0	0	0	0	0	0	0
OTU_4823;size=3;	;Root;100%;Bacteria;100%;"Chloroflexi";75%;Thermomicrobia;58%;Sphaerobacteridae;58%;Sphaerobacterales;58%;"Sphaerobacterineae";58%;Sphaerobacteraceae;58%;Sphaerobacter;58%	0	0	0	0	0	0	0	0	0	0	0	0	0	0	0	0	0	0	0	0	0	0	0	0	0	1	0	0	0	0	0
OTU_484;size=359;	;Root;100%;Bacteria;100%;"Bacteroidetes";100%;Sphingobacteriia;100%;"Sphingobacteriales";100%;Chitinophagaceae;100%;Niastella;100%	0	0	0	0	0	0	0	0	0	0	0	0	0	0	0	0	0	0	0	0	0	0	0	0	0	0	0	0	0	0	0
OTU_487;size=128;	;Root;100%;Bacteria;100%;"Actinobacteria";100%;Actinobacteria;100%;Coriobacteridae;100%;Coriobacteriales;100%;"Coriobacterineae";100%;Coriobacteriaceae;100%;Atopobium;90%	3	0	5	3	2	3	0	14	0	0	1	4	10	0	10	15	1	1	0	0	1	0	4	6	37	1	0	0	3	5	29
OTU_4891;size=3;	;Root;100%;Bacteria;100%;"Actinobacteria";100%;Actinobacteria;100%;Actinobacteridae;100%;Actinomycetales;100%;Propionibacterineae;100%;Nocardioidaceae;84%;Aeromicrobium;82%	0	0	0	0	0	0	0	0	0	0	0	0	0	0	0	0	0	1	0	0	0	0	0	0	0	0	0	0	0	0	0
OTU_4897;size=3;	;Root;100%;Bacteria;100%;"Actinobacteria";90%;Actinobacteria;90%;Acidimicrobidae;51%;Acidimicrobiales;51%;"Acidimicrobineae";51%;Iamiaceae;37%;Iamia;37%	0	0	0	0	0	0	0	0	0	0	0	0	0	0	0	0	0	0	0	0	0	0	0	0	0	2	0	0	0	0	0
OTU_49;size=9477;	;Root;100%;Bacteria;100%;Firmicutes;78%;Erysipelotrichia;77%;Erysipelotrichales;77%;Erysipelotrichaceae;77%;Holdemania;70%	60	15	61	42	44	267	153	178	52	174	35	129	549	9	1348	862	439	209	129	285	116	12	154	458	1702	441	96	191	183	188	1789
OTU_491;size=186;	;Root;100%;Bacteria;100%;"Bacteroidetes";100%;Sphingobacteriia;100%;"Sphingobacteriales";100%;Sphingobacteriaceae;100%;Sphingobacterium;100%	0	0	0	0	0	0	0	0	0	0	0	0	0	0	0	0	0	0	0	0	0	0	0	0	0	0	0	0	0	0	0
OTU_494;size=297;	;Root;100%;Bacteria;100%;"Proteobacteria";100%;Gammaproteobacteria;100%;Xanthomonadales;100%;Xanthomonadaceae;100%;Stenotrophomonas;79%	0	0	0	0	0	0	0	0	0	0	0	0	0	0	0	0	0	0	0	0	0	0	0	0	0	0	0	0	0	0	0
OTU_495;size=203;	;Root;100%;Bacteria;100%;Firmicutes;100%;Negativicutes;100%;Selenomonadales;100%;Veillonellaceae;100%;Veillonella;97%	0	0	0	0	3	0	0	1	0	3	0	0	6	0	11	0	178	0	0	0	0	0	5	5	42	0	0	0	0	0	0
OTU_496;size=118;	;Root;100%;Bacteria;100%;Firmicutes;93%;Clostridia;89%;Clostridiales;89%;Ruminococcaceae;72%;Saccharofermentans;35%	0	1	0	0	1	0	0	0	0	0	0	0	1	0	0	0	0	0	0	0	0	0	1	2	50	0	2	11	1	7	64
OTU_5;size=133205;	;Root;100%;Bacteria;100%;Firmicutes;100%;Bacilli;100%;Lactobacillales;100%;Streptococcaceae;100%;Streptococcus;100%	0	0	0	0	0	0	0	0	0	0	0	0	0	0	0	0	0	0	0	0	0	0	0	0	0	0	0	0	0	0	0
OTU_503;size=116;	;Root;100%;Bacteria;92%;Firmicutes;40%;Erysipelotrichia;20%;Erysipelotrichales;20%;Erysipelotrichaceae;20%;Eggerthia;20%	0	0	0	0	0	0	0	0	0	0	0	0	0	1	0	0	0	0	0	0	0	0	0	0	0	0	0	0	0	0	0
OTU_507;size=309;	;Root;100%;Bacteria;100%;"Actinobacteria";100%;Actinobacteria;100%;Actinobacteridae;100%;Actinomycetales;100%;Micromonosporineae;100%;Micromonosporaceae;100%;Virgisporangium;100%	0	0	0	0	0	0	0	0	0	0	0	0	0	0	1	0	0	0	0	0	0	0	0	0	0	0	0	0	0	0	0
OTU_51;size=14037;	;Root;100%;Bacteria;96%;"Proteobacteria";40%;Alphaproteobacteria;9%;Rhodospirillales;5%;Acetobacteraceae;5%;Rubritepida;4%	2	0	1	0	0	0	0	0	0	0	0	0	0	0	0	0	0	0	0	0	0	0	0	0	0	1	0	0	0	0	0
OTU_512;size=113;	;Root;100%;Bacteria;100%;"Proteobacteria";100%;Gammaproteobacteria;98%;Pasteurellales;89%;Pasteurellaceae;89%;Lonepinella;31%	0	0	0	129	1	0	0	0	0	0	0	0	3	0	0	0	5	0	0	0	0	0	0	0	0	0	0	0	0	0	0
OTU_518;size=346;	;Root;100%;Bacteria;100%;"Acidobacteria";100%;Acidobacteria_Gp1;100%;Granulicella;93%	0	0	0	0	1	0	0	0	0	0	0	0	0	0	0	0	0	0	0	0	0	0	0	0	0	0	0	0	0	0	0
OTU_523;size=210;	;Root;100%;Bacteria;100%;"Actinobacteria";100%;Actinobacteria;100%;Actinobacteridae;100%;Actinomycetales;100%;Kineosporiineae;100%;Kineosporiaceae;100%;Kineosporia;100%	0	0	0	0	1	0	0	0	0	0	0	0	0	0	0	0	0	0	0	0	0	0	0	0	0	0	0	0	0	0	0
OTU_53;size=9522;	;Root;100%;Bacteria;100%;"Bacteroidetes";70%;Flavobacteriia;23%;"Flavobacteriales";23%;Flavobacteriaceae;23%;Cruoricaptor;20%	0	2	84	21	1	6	143	95	1	180	29	162	103	17	343	222	563	47	16	474	1021	289	692	133	6081	7	21	82	42	6	264
OTU_537;size=375;	;Root;100%;Bacteria;100%;"Actinobacteria";100%;Actinobacteria;100%;Actinobacteridae;100%;Actinomycetales;100%;Frankineae;100%;Geodermatophilaceae;100%;Blastococcus;84%	0	0	0	0	0	0	0	0	0	0	0	0	0	0	0	0	0	0	0	0	0	3	0	0	0	1	0	0	0	0	0
OTU_538;size=198;	;Root;100%;Bacteria;100%;"Acidobacteria";100%;Acidobacteria_Gp1;100%;Granulicella;67%	0	0	0	1	1	0	0	0	0	0	0	0	0	0	0	0	0	0	0	2	6	0	0	0	0	0	0	0	0	0	0
OTU_55;size=8763;	;Root;100%;Bacteria;100%;"Proteobacteria";97%;Gammaproteobacteria;85%;Cardiobacteriales;63%;Cardiobacteriaceae;63%;Cardiobacterium;36%	13	0	282	138	76	109	116	78	24	577	151	182	209	40	157	282	1073	186	130	1843	1364	520	294	616	160	49	227	196	4	54	749
OTU_551;size=98;	;Root;100%;Bacteria;100%;Firmicutes;100%;Bacilli;100%;Lactobacillales;100%;Lactobacillaceae;100%;Lactobacillus;100%	0	0	0	3	0	0	0	0	0	0	0	0	3	0	0	0	61	56	0	0	0	0	0	0	1	0	0	0	0	0	0
OTU_552;size=266;	;Root;100%;Bacteria;100%;"Actinobacteria";100%;Actinobacteria;100%;Actinobacteridae;100%;Actinomycetales;100%;Frankineae;100%;Geodermatophilaceae;100%;Blastococcus;88%	0	0	0	0	0	0	0	0	0	0	0	0	0	1	0	0	0	0	0	0	0	0	0	0	0	0	0	0	0	0	0
OTU_565;size=444;	;Root;100%;Bacteria;100%;"Proteobacteria";100%;Alphaproteobacteria;99%;Rhizobiales;76%;Phyllobacteriaceae;44%;Thermovum;33%	0	0	0	0	0	0	0	0	0	0	0	0	0	0	0	0	0	0	0	0	0	0	1	0	0	0	0	0	0	0	0
OTU_573;size=199;	;Root;100%;Bacteria;100%;"Proteobacteria";100%;Alphaproteobacteria;99%;Rhodospirillales;97%;Acetobacteraceae;67%;Stella;29%	0	0	0	0	0	0	0	0	0	0	0	0	0	0	0	0	0	0	0	0	0	0	1	0	0	0	0	0	0	0	0
OTU_578;size=188;	;Root;100%;Bacteria;100%;"Actinobacteria";100%;Actinobacteria;100%;Actinobacteridae;100%;Actinomycetales;100%;Micrococcineae;100%;Microbacteriaceae;100%;Curtobacterium;87%	0	0	0	0	0	0	0	0	0	0	0	0	0	0	0	0	0	0	0	0	0	0	0	0	0	0	0	0	0	0	0
OTU_579;size=91;	;Root;100%;Bacteria;100%;"Actinobacteria";53%;Actinobacteria;53%;Actinobacteridae;42%;Actinomycetales;42%;Glycomycineae;11%;Glycomycetaceae;11%;Haloglycomyces;9%	0	1	1	0	0	14	21	4	6	0	0	15	0	3	0	4	9	1	0	5	14	5	0	0	0	0	0	0	0	1	11
OTU_58;size=8003;	;Root;100%;Bacteria;100%;"Bacteroidetes";100%;"Bacteroidia";100%;"Bacteroidales";100%;"Porphyromonadaceae";100%;Porphyromonas;46%	578	319	175	39	0	73	25	7	6	131	9	49	4	26	83	499	3495	141	192	678	34	20	922	772	67	19	88	1	68	183	281
OTU_580;size=204;	;Root;100%;Bacteria;100%;"Gemmatimonadetes";49%;Gemmatimonadetes;49%;Gemmatimonadales;49%;Gemmatimonadaceae;49%;Gemmatimonas;49%	0	0	0	0	0	0	0	0	0	0	0	0	1	0	0	0	0	0	0	0	0	0	0	0	0	0	0	0	0	0	0
OTU_59;size=8079;	;Root;100%;Bacteria;100%;"Proteobacteria";100%;Gammaproteobacteria;100%;Pasteurellales;100%;Pasteurellaceae;100%;Actinobacillus;48%	88	61	74	19	0	2	2	0	0	21	1	16	7	0	0	89	0	7043	0	1207	0	4	137	0	56	0	0	218	2	5	30
OTU_590;size=192;	;Root;100%;Bacteria;100%;"Acidobacteria";39%;Acidobacteria_Gp16;39%;Gp16;39%	0	0	0	0	0	0	0	0	0	0	0	0	0	0	0	0	0	0	0	0	0	0	0	0	0	0	0	0	0	0	0
OTU_596;size=247;	;Root;100%;Bacteria;100%;"Actinobacteria";100%;Actinobacteria;100%;Actinobacteridae;100%;Actinomycetales;100%;Kineosporiineae;40%;Kineosporiaceae;40%;Kineosporia;39%	0	0	0	0	0	0	0	0	0	0	0	0	0	0	0	0	0	0	0	0	0	0	0	0	0	0	0	0	0	0	0
OTU_599;size=89;	;Root;100%;Bacteria;100%;"Proteobacteria";100%;Gammaproteobacteria;100%;Pseudomonadales;100%;Moraxellaceae;100%;Psychrobacter;99%	0	0	0	0	0	0	0	0	0	0	0	0	0	0	0	0	0	0	0	0	0	0	1	0	0	0	0	0	0	0	2
OTU_60;size=8236;	;Root;100%;Bacteria;90%;"Proteobacteria";39%;Alphaproteobacteria;22%;Rhodospirillales;18%;Acetobacteraceae;16%;Rhodopila;5%	0	0	0	0	0	0	0	0	0	0	0	0	0	0	0	0	0	0	0	0	0	0	0	0	0	0	0	0	0	0	0
OTU_600;size=1677;	;Root;100%;Bacteria;100%;"Fusobacteria";100%;Fusobacteriia;100%;"Fusobacteriales";100%;"Leptotrichiaceae";100%;Sneathia;51%	1350	1892	1289	0	47	1698	481	40	152	85	4	217	93	86	397	520	387	86	2004	164	73	256	84	299	1906	509	54	662	272	156	614
OTU_606;size=385;	;Root;100%;Bacteria;100%;"Bacteroidetes";100%;Sphingobacteriia;100%;"Sphingobacteriales";100%;Chitinophagaceae;100%;Flavisolibacter;74%	0	0	1	0	0	0	0	0	0	0	0	0	0	0	0	0	0	0	0	0	0	0	0	0	0	0	0	0	0	0	0
OTU_613;size=348;	;Root;100%;Bacteria;100%;"Bacteroidetes";100%;Sphingobacteriia;100%;"Sphingobacteriales";100%;Chitinophagaceae;100%;Flavisolibacter;76%	0	0	0	1	0	0	0	0	0	0	0	0	0	0	0	0	0	1	0	0	0	0	0	0	0	0	0	0	0	0	0
OTU_617;size=79;	;Root;100%;Bacteria;100%;"Actinobacteria";100%;Actinobacteria;100%;Actinobacteridae;100%;Actinomycetales;100%;Actinomycineae;73%;Actinomycetaceae;73%;Actinobaculum;71%	1	0	2	0	2	3	0	4	0	5	2	1	4	0	0	8	0	0	0	1	2	2	1	15	21	0	7	9	2	2	3
OTU_618;size=125;	;Root;100%;Bacteria;100%;"Gemmatimonadetes";100%;Gemmatimonadetes;100%;Gemmatimonadales;100%;Gemmatimonadaceae;100%;Gemmatimonas;100%	1	0	0	0	0	0	0	0	0	0	0	0	0	0	0	0	0	0	0	0	0	0	0	0	0	0	0	0	0	0	0
OTU_62;size=8792;	;Root;100%;Bacteria;100%;"Actinobacteria";100%;Actinobacteria;100%;Actinobacteridae;100%;Actinomycetales;100%;Actinomycineae;100%;Actinomycetaceae;100%;Actinomyces;100%	0	0	0	0	0	0	0	0	0	0	0	0	0	0	0	0	0	0	0	0	0	0	0	0	0	0	0	0	0	0	0
OTU_620;size=277;	;Root;100%;Bacteria;100%;"Chloroflexi";78%;Thermomicrobia;70%;Sphaerobacteridae;70%;Sphaerobacterales;70%;"Sphaerobacterineae";70%;Sphaerobacteraceae;70%;Sphaerobacter;70%	0	0	0	0	0	0	0	0	0	0	0	0	0	0	0	0	0	0	0	0	0	0	0	0	0	0	0	0	0	0	0
OTU_623;size=191;	;Root;100%;Bacteria;100%;"Actinobacteria";100%;Actinobacteria;100%;Rubrobacteridae;100%;Rubrobacterales;100%;"Rubrobacterineae";100%;Rubrobacteraceae;100%;Rubrobacter;100%	0	0	0	0	0	0	0	0	0	0	0	0	0	0	0	0	0	0	0	0	1	0	0	0	0	0	0	0	0	0	0
OTU_629;size=75;	;Root;100%;Bacteria;100%;"Proteobacteria";100%;Betaproteobacteria;100%;Hydrogenophilales;100%;Hydrogenophilaceae;100%;Hydrogenophilus;100%	0	0	0	0	0	0	0	0	0	0	0	0	0	0	0	0	0	0	0	3	0	0	0	0	0	0	0	0	0	0	0
OTU_633;size=81;	;Root;100%;Bacteria;100%;"Fusobacteria";100%;Fusobacteriia;100%;"Fusobacteriales";100%;"Leptotrichiaceae";100%;Sneathia;62%	0	0	0	100	0	0	0	0	0	0	0	0	0	0	0	0	0	0	0	0	0	0	0	0	0	0	0	0	0	0	0
OTU_634;size=193;	;Root;100%;Bacteria;100%;"Proteobacteria";100%;Alphaproteobacteria;100%;Rhodospirillales;100%;Acetobacteraceae;100%;Roseomonas;99%	0	0	0	0	0	0	0	0	0	0	0	0	0	0	0	0	0	0	0	0	0	0	0	0	0	0	0	0	0	0	0
OTU_64;size=8765;	;Root;100%;Bacteria;100%;Cyanobacteria/Chloroplast;62%;Chloroplast;59%;Chloroplast;59%;Streptophyta;53%	0	0	0	0	0	0	0	0	0	0	0	0	0	0	0	0	0	0	0	0	0	0	0	0	1	0	0	0	0	0	0
OTU_650;size=78;	;Root;100%;Bacteria;100%;"Proteobacteria";100%;Alphaproteobacteria;100%;Rhodospirillales;100%;Acetobacteraceae;100%;Paracraurococcus;45%	0	0	0	0	0	0	0	0	0	0	0	0	0	0	0	0	0	0	0	0	0	0	0	0	0	0	0	0	0	0	0
OTU_651;size=86;	;Root;100%;Bacteria;100%;"Deinococcus-Thermus";100%;Deinococci;100%;Deinococcales;99%;Deinococcaceae;98%;Deinococcus;84%	0	0	0	0	0	0	0	0	0	0	0	0	0	0	0	0	0	0	0	0	0	0	0	0	0	0	0	0	0	0	0
OTU_652;size=225;	;Root;100%;Bacteria;100%;"Actinobacteria";100%;Actinobacteria;100%;Acidimicrobidae;99%;Acidimicrobiales;99%;"Acidimicrobineae";99%;"Acidimicrobineae"_incertae_sedis;58%;Aciditerrimonas;58%	0	0	0	0	0	0	0	0	0	0	0	0	0	0	0	10	0	0	0	0	0	0	0	0	0	0	0	0	0	0	0
OTU_654;size=131;	;Root;100%;Bacteria;100%;"Proteobacteria";100%;Alphaproteobacteria;100%;Rhizobiales;88%;Beijerinckiaceae;33%;Chelatococcus;28%	0	0	0	0	0	0	0	0	0	0	0	0	0	0	0	0	0	0	0	0	0	0	0	0	0	0	0	0	0	0	0
OTU_656;size=90;	;Root;100%;Bacteria;100%;"Proteobacteria";100%;Betaproteobacteria;100%;Burkholderiales;100%;Burkholderiaceae;100%;Burkholderia;100%	0	0	0	0	0	0	0	0	0	0	0	0	0	0	0	0	0	0	2	0	0	0	0	0	0	0	0	0	0	0	0
OTU_659;size=100;	;Root;100%;Bacteria;100%;"Acidobacteria";100%;Acidobacteria_Gp3;100%;Gp3;100%	0	0	0	0	0	0	0	0	0	0	0	0	0	0	0	0	0	0	0	0	0	0	0	0	0	0	0	0	0	0	0
OTU_663;size=156;	;Root;100%;Bacteria;100%;"Proteobacteria";100%;Alphaproteobacteria;100%;Rhodobacterales;100%;Rhodobacteraceae;100%;Gemmobacter;75%	0	0	0	0	0	0	0	0	0	0	0	0	0	0	0	0	0	0	0	0	2	0	0	0	0	0	0	0	0	0	0
OTU_67;size=7036;	;Root;100%;Bacteria;100%;Firmicutes;99%;Clostridia;99%;Clostridiales;99%;Ruminococcaceae;97%;Saccharofermentans;78%	1	0	0	0	12	786	920	71	207	184	2	196	129	48	0	1	614	253	2741	0	0	1	23	77	399	202	0	426	103	16	0
OTU_670;size=291;	;Root;100%;Bacteria;100%;"Planctomycetes";100%;Planctomycetia;100%;Planctomycetales;100%;Planctomycetaceae;100%;Aquisphaera;68%	0	0	0	0	0	0	0	0	0	0	0	0	0	0	0	0	0	0	0	0	0	0	0	0	0	3	0	0	0	0	0
OTU_68;size=19054;	;Root;100%;Bacteria;100%;Cyanobacteria/Chloroplast;88%;Chloroplast;88%;Chloroplast;88%;Streptophyta;69%	0	0	0	0	0	0	0	0	0	0	0	0	0	0	0	0	0	0	0	0	0	0	1	0	1	1	0	1	0	0	1
OTU_687;size=436;	;Root;100%;Bacteria;100%;"Proteobacteria";100%;Alphaproteobacteria;100%;Rhizobiales;100%;Methylobacteriaceae;100%;Methylobacterium;75%	0	0	0	0	0	0	0	0	0	0	0	0	0	0	0	0	0	0	0	0	0	0	0	0	0	0	0	0	0	0	0
OTU_69;size=7933;	;Root;100%;Bacteria;89%;"Proteobacteria";37%;Alphaproteobacteria;19%;Rhodospirillales;9%;Acetobacteraceae;8%;Rubritepida;3%	1	0	0	0	0	0	0	0	0	0	0	0	0	0	0	0	0	0	0	0	0	0	0	0	0	0	0	0	0	0	0
OTU_697;size=66;	;Root;100%;Bacteria;100%;"Bacteroidetes";100%;Flavobacteriia;100%;"Flavobacteriales";100%;Flavobacteriaceae;100%;Coenonia;58%	0	0	0	80	0	0	0	0	0	0	0	0	0	0	0	0	1	1	0	0	0	0	0	0	0	0	0	0	0	0	0
OTU_7;size=96416;	;Root;100%;Bacteria;100%;"Proteobacteria";100%;Gammaproteobacteria;100%;Cardiobacteriales;99%;Cardiobacteriaceae;99%;Suttonella;96%	441	1245	54	177	364	2175	2490	716	632	4346	70	7404	436	2546	195	3134	5054	851	198	12720	5206	894	5106	9358	638	1024	3579	4794	1023	3062	9233
OTU_70;size=6607;	;Root;100%;Bacteria;99%;"Proteobacteria";53%;Gammaproteobacteria;37%;Candidatus Carsonella;31%	0	0	0	0	0	0	0	1	0	0	0	0	0	0	0	0	0	0	0	0	0	0	0	0	0	0	0	0	0	0	0
OTU_705;size=111;	;Root;100%;Bacteria;100%;"Proteobacteria";99%;Gammaproteobacteria;95%;Gammaproteobacteria_incertae_sedis;41%;Thiohalobacter;41%	0	0	0	0	0	0	0	0	0	0	0	0	0	0	0	0	0	0	0	0	0	0	0	1	0	0	0	0	0	0	0
OTU_71;size=8330;	;Root;100%;Bacteria;100%;"Proteobacteria";100%;Gammaproteobacteria;100%;Pseudomonadales;100%;Pseudomonadaceae;100%;Pseudomonas;98%	0	0	0	0	0	0	0	0	0	0	1	0	0	0	0	0	0	0	0	0	0	0	0	0	0	0	0	0	0	0	0
OTU_72;size=6244;	;Root;100%;Bacteria;100%;Firmicutes;99%;Clostridia;99%;Clostridiales;99%;Lachnospiraceae;97%;Oribacterium;44%	3	2	1	0	8	355	342	491	96	50	4	138	113	43	877	524	447	68	4	999	1257	319	227	144	1	2	14	9	13	16	510
OTU_720;size=105;	;Root;100%;Bacteria;100%;"Proteobacteria";100%;Alphaproteobacteria;98%;Alphaproteobacteria_incertae_sedis;85%;Geminicoccus;84%	0	0	0	0	0	0	1	0	0	0	0	0	0	0	0	0	0	0	0	0	0	0	0	0	0	0	0	0	0	0	0
OTU_721;size=119;	;Root;100%;Bacteria;100%;"Actinobacteria";100%;Actinobacteria;100%;Actinobacteridae;100%;Actinomycetales;100%;Pseudonocardineae;100%;Pseudonocardiaceae;100%;Actinomycetospora;100%	0	0	0	0	0	0	0	0	0	0	0	0	0	0	0	0	0	0	0	0	0	0	1	0	0	0	0	1	0	0	0
OTU_734;size=168;	;Root;100%;Bacteria;100%;Cyanobacteria/Chloroplast;68%;Chloroplast;37%;Chloroplast;37%;Chlorophyta;21%	0	0	0	0	0	0	0	0	0	0	0	0	0	0	0	0	0	0	0	0	0	0	1	0	0	0	0	0	0	0	0
OTU_738;size=59;	;Root;100%;Bacteria;100%;Firmicutes;99%;Clostridia;98%;Clostridiales;98%;Clostridiales_Incertae Sedis XIII;70%;Anaerovorax;70%	0	0	0	0	0	2	3	15	4	7	0	0	24	0	0	0	0	0	0	0	0	0	0	4	0	0	0	1	0	1	11
OTU_74;size=6456;	;Root;100%;Bacteria;100%;"Actinobacteria";100%;Actinobacteria;100%;Actinobacteridae;100%;Actinomycetales;100%;Actinomycineae;98%;Actinomycetaceae;98%;Varibaculum;78%	869	310	609	6	25	970	908	159	198	70	14	114	82	62	112	73	462	75	1088	87	28	158	12	120	178	55	0	53	49	36	92
OTU_750;size=92;	;Root;100%;Bacteria;100%;"Proteobacteria";100%;Gammaproteobacteria;100%;Xanthomonadales;100%;Xanthomonadaceae;100%;Dyella;85%	0	0	0	0	0	0	0	0	0	0	0	0	0	0	0	0	0	0	0	0	0	0	0	0	0	0	0	0	0	0	0
OTU_752;size=57;	;Root;100%;Bacteria;100%;Firmicutes;100%;Bacilli;100%;Lactobacillales;100%;Lactobacillaceae;100%;Lactobacillus;100%	0	0	0	0	0	0	0	0	0	0	0	0	0	0	0	0	41	27	0	0	0	0	0	0	0	0	1	0	0	0	0
OTU_773;size=477;	;Root;100%;Bacteria;100%;candidate division WPS-1;74%;WPS-1_genera_incertae_sedis;74%	0	0	0	0	0	0	0	0	0	0	0	0	0	0	0	0	0	0	0	0	0	0	0	0	2	0	0	0	0	0	0
OTU_79;size=9284;	;Root;100%;Bacteria;100%;"Bacteroidetes";100%;"Bacteroidia";100%;"Bacteroidales";100%;"Porphyromonadaceae";100%;Proteiniphilum;73%	21	10	125	142	65	97	161	108	20	148	13	72	190	16	48	53	4	13	0	1228	453	238	1155	1195	1127	181	106	158	435	459	2590
OTU_803;size=55;	;Root;100%;Bacteria;100%;"Proteobacteria";100%;Gammaproteobacteria;100%;Pseudomonadales;100%;Moraxellaceae;100%;Enhydrobacter;99%	0	0	0	0	0	0	0	0	0	0	0	0	0	0	0	0	0	0	0	0	0	0	0	0	0	0	0	0	1	0	0
OTU_810;size=191;	;Root;100%;Bacteria;97%;"Planctomycetes";66%;Planctomycetia;66%;Planctomycetales;66%;Planctomycetaceae;66%;Schlesneria;31%	0	0	1	0	0	0	0	0	0	0	0	0	0	0	0	0	0	0	0	0	0	0	0	0	0	0	0	0	0	0	0
OTU_815;size=88;	;Root;100%;Bacteria;100%;"Proteobacteria";100%;Alphaproteobacteria;100%;Rhodospirillales;100%;Acetobacteraceae;99%;Granulibacter;18%	0	0	0	0	0	0	0	0	0	0	0	0	0	0	0	0	0	0	0	0	0	0	0	0	1	0	0	2	0	0	0
OTU_819;size=380;	;Root;100%;Bacteria;100%;"Acidobacteria";100%;Acidobacteria_Gp6;100%;Gp6;100%	0	0	0	0	0	0	0	0	0	0	0	0	0	0	0	0	0	0	0	0	0	0	0	0	0	0	0	0	0	0	0
OTU_82;size=4313;	;Root;100%;Bacteria;100%;Firmicutes;99%;Clostridia;99%;Clostridiales;99%;Clostridiales_Incertae Sedis XI;95%;Parvimonas;72%	30	8	68	59	96	44	64	197	30	55	7	79	319	19	4	190	79	26	3	89	24	10	226	199	1776	121	18	157	380	32	254
OTU_821;size=79;	;Root;100%;Bacteria;100%;"Bacteroidetes";100%;Cytophagia;100%;Cytophagales;100%;Cytophagaceae;100%;Dyadobacter;100%	0	0	0	0	0	0	0	0	0	0	0	0	0	0	0	0	0	0	0	0	0	0	5	0	0	0	0	0	0	0	0
OTU_84;size=7771;	;Root;100%;Bacteria;100%;Firmicutes;100%;Bacilli;100%;Lactobacillales;100%;Enterococcaceae;100%;Enterococcus;100%	1	0	0	0	0	0	0	0	0	0	0	0	0	0	0	0	0	0	0	0	0	0	0	0	0	0	0	0	0	0	0
OTU_840;size=120;	;Root;100%;Bacteria;99%;"Actinobacteria";96%;Actinobacteria;92%;Rubrobacteridae;80%;Gaiellales;78%;Gaiellaceae;78%;Gaiella;78%	0	0	0	0	0	0	0	0	0	0	0	0	0	0	0	0	0	0	0	0	0	0	0	0	0	0	0	0	0	0	0
OTU_841;size=135;	;Root;100%;Bacteria;100%;"Proteobacteria";100%;Alphaproteobacteria;100%;Sphingomonadales;100%;Sphingomonadaceae;89%;Novosphingobium;84%	0	0	0	0	0	0	0	0	0	0	0	0	0	0	0	0	0	0	0	0	0	0	0	0	0	0	0	0	0	0	0
OTU_851;size=81;	;Root;100%;Bacteria;99%;"Chloroflexi";70%;Thermomicrobia;58%;Sphaerobacteridae;57%;Sphaerobacterales;57%;"Sphaerobacterineae";57%;Sphaerobacteraceae;57%;Sphaerobacter;57%	0	0	0	0	0	0	0	0	0	0	0	0	0	0	0	0	0	0	0	0	0	0	4	0	0	0	0	0	0	0	0
OTU_855;size=152;	;Root;100%;Bacteria;100%;"Bacteroidetes";100%;Cytophagia;99%;Cytophagales;99%;Cytophagaceae;99%;Adhaeribacter;96%	0	0	0	0	0	0	0	0	0	0	0	0	0	0	0	0	0	0	0	0	0	0	0	0	0	0	0	0	0	0	0
OTU_862;size=46;	;Root;100%;Bacteria;100%;Firmicutes;20%;Bacilli;18%;Bacillales;18%;Thermoactinomycetaceae 1;17%;Hazenella;6%	0	0	0	1	0	0	0	0	0	0	0	0	0	0	0	0	0	0	0	0	0	0	0	0	0	0	0	0	0	0	0
OTU_87;size=3939;	;Root;100%;Bacteria;100%;Firmicutes;87%;Clostridia;83%;Clostridiales;81%;Peptostreptococcaceae;62%;Acetoanaerobium;26%	10	4	134	50	2	55	83	194	25	194	21	230	61	25	712	290	208	49	36	359	213	58	157	378	263	3	41	124	19	16	470
OTU_870;size=59;	;Root;100%;Bacteria;100%;Firmicutes;100%;Bacilli;100%;Bacillales;100%;Bacillaceae 1;55%;Bacillus;36%	0	0	0	0	0	0	0	0	0	0	0	0	0	0	0	0	0	0	0	0	0	0	0	0	0	0	0	0	0	0	0
OTU_88;size=5648;	;Root;100%;Bacteria;100%;Firmicutes;100%;Bacilli;100%;Lactobacillales;100%;Streptococcaceae;100%;Streptococcus;100%	0	0	0	0	0	0	0	0	0	0	0	0	0	0	0	0	2	0	0	0	0	0	2	0	0	0	2	0	0	0	0
OTU_888;size=107;	;Root;100%;Bacteria;99%;Firmicutes;24%;Bacilli;19%;Bacillales;18%;Thermoactinomycetaceae 2;2%;Polycladomyces;0%	0	0	0	0	0	0	0	0	0	0	0	0	0	0	0	0	0	0	0	0	0	0	0	0	0	0	0	0	0	0	0
OTU_89;size=3900;	;Root;100%;Bacteria;100%;Firmicutes;100%;Clostridia;100%;Clostridiales;100%;Peptostreptococcaceae;100%;Peptostreptococcus;93%	62	18	130	49	92	135	74	140	17	63	40	55	158	11	363	283	108	38	18	151	92	23	176	269	670	43	46	98	100	55	785
OTU_899;size=109;	;Root;100%;Bacteria;100%;"Actinobacteria";100%;Actinobacteria;100%;Actinobacteridae;100%;Actinomycetales;100%;Micrococcineae;100%;Microbacteriaceae;100%;Agromyces;92%	0	0	0	0	0	0	0	0	0	0	0	0	0	0	0	0	4	0	0	0	0	0	0	1	0	0	0	0	0	0	0
OTU_900;size=170;	;Root;100%;Bacteria;100%;"Proteobacteria";100%;Gammaproteobacteria;95%;Alteromonadales;58%;Alteromonadaceae;58%;Haliea;58%	0	0	0	0	0	0	0	0	0	0	0	0	1	0	0	0	0	0	0	0	0	0	0	0	0	0	0	0	0	0	0
OTU_909;size=132;	;Root;100%;Bacteria;100%;"Proteobacteria";100%;Alphaproteobacteria;100%;Sphingomonadales;98%;Sphingomonadaceae;98%;Sphingomonas;96%	0	0	0	0	1	0	0	0	0	0	0	0	0	0	0	0	0	0	0	0	0	0	0	0	0	0	0	0	0	0	0
OTU_91;size=15604;	;Root;100%;Bacteria;100%;Cyanobacteria/Chloroplast;47%;Chloroplast;45%;Chloroplast;45%;Streptophyta;35%	0	0	0	0	0	0	1	0	0	0	0	0	0	0	0	0	2	0	0	0	0	0	0	0	1	0	0	0	0	0	0
OTU_913;size=94;	;Root;100%;Bacteria;100%;"Acidobacteria";100%;Acidobacteria_Gp6;100%;Gp6;100%	0	0	0	0	0	0	0	0	0	0	0	0	0	0	0	0	0	0	0	0	0	0	0	0	0	0	0	0	0	0	0
OTU_928;size=40;	;Root;100%;Bacteria;100%;"Proteobacteria";100%;Alphaproteobacteria;99%;Rhodobacterales;92%;Rhodobacteraceae;92%;Albidovulum;53%	0	0	0	0	0	0	0	0	0	0	0	0	0	0	0	0	0	0	0	0	0	0	0	0	0	0	0	0	0	0	0
OTU_931;size=67;	;Root;100%;Bacteria;99%;"Chloroflexi";33%;Chloroflexia;22%;"Chloroflexales";22%;Chloroflexineae;22%;Chloroflexaceae;21%;Roseiflexus;20%	0	0	0	0	0	0	0	0	0	0	0	0	0	0	0	0	0	0	0	0	0	0	1	0	0	0	0	0	0	0	0
OTU_932;size=55;	;Root;100%;Bacteria;100%;"Proteobacteria";100%;Alphaproteobacteria;100%;Rhodospirillales;100%;Acetobacteraceae;100%;Acidisphaera;21%	0	0	0	0	0	0	0	0	0	0	0	0	0	0	0	0	0	0	0	0	0	0	0	0	0	0	0	0	0	0	0
OTU_94;size=5584;	;Root;100%;Bacteria;100%;"Actinobacteria";100%;Actinobacteria;100%;Actinobacteridae;100%;Actinomycetales;100%;Micrococcineae;100%;Micrococcaceae;100%;Arthrobacter;98%	0	0	0	0	0	0	0	0	0	0	0	0	1	0	0	0	0	0	0	0	0	0	0	0	1	0	0	0	0	0	2
OTU_965;size=73;	;Root;100%;Bacteria;100%;"Proteobacteria";100%;Gammaproteobacteria;100%;Xanthomonadales;100%;Xanthomonadaceae;100%;Xanthomonas;100%	0	0	0	0	0	0	0	0	0	0	0	0	0	0	0	0	0	0	0	0	0	0	0	0	0	0	0	15	0	0	0
