# Supplementary material for: Age-related variation in the oral microbiome of urban Cooper’s hawks (Accipiter cooperii)
Source: BMC Microbiol. 2019 Feb 21;19:47. doi: 10.1186/s12866-019-1413-y (PMC6385412; doi:10.1186/s12866-019-1413-y)
Supplement: Supplementary file 3 — Table S2. Mock community, number of operons, and average reads observed for the even and staggered mock communities. Table containing details for each mock community. (XLSX 56 kb) [file 12866_2019_1413_MOESM3_ESM.xlsx]

## Sheet: Sheet1
Supplementary Table 2. Mock community, number of operons in the even mock community; average reads observed for the
mock-even community; number of operons in the staggered mock community; average reads observed for the mock-staggered
community. Staphylococcus aureus and S. epidermidis are in the same OTU because their 16S sequences are ≥ 97% similar.
Mock communities were obtained from BEI.
OTU ID	Species	# operons (even)	Avg reads ± SD (even)	# operons (staggered)	Avg reads ± SD (staggered)
OTU_62;size=8792;	Actinomyces odontolyticus	100000	2036.6 ± 191.1	10000	9.4 ± 3.6
OTU_23;size=40245;	Bacteroides vulgatus	100000	8870.2 ± 712.9	10000	40.8 ± 9.9
OTU_26;size=27011;	Deinococcus radiodurans	100000	5908.4 ± 793.6	10000	20.0 ± 6.2
OTU_84;size=7771;	Enterococcus faecalis	100000	1736.0 ± 222.0	10000	9.0 ± 2.7
OTU_88;size=5648;	Streptococcus pneumoniae	100000	1338.2 ± 114.1	10000	8.8 ± 1.9
OTU_25;size=30993;	Acinetobacter baumannii	100000	6295.8 ± 707.0	100000	339.2 ± 75.9
OTU_16;size=45408;	Helicobacter pylori	100000	9266.8 ± 973.2	100000	438.8 ± 99.1
OTU_40;size=16389;	Lactobacillus gasseri	100000	3553.4 ± 429.4	100000	182.4 ± 32.3
OTU_54;size=12852;	Listeria monocytogenes	100000	2907.8 ± 440.8	100000	109.8 ± 27.5
OTU_19;size=38196;	Neisseria meningitidis	100000	7928.8 ± 1115.4	100000	420.8 ± 90.8
OTU_677;size=475;	Propionibacterium acnes	100000	122.0 ± 15.5	100000	10.4 ± 2.5.0
OTU_312;size=6223;	Bacillus cereus	100000	1146.2 ± 166.2	1000000	379.0 ± 85.1
OTU_24;size=33096;	Clostridium beijerinckii	100000	4735.2 ± 729.8	1000000	2502.8 ± 513.4
OTU_71;size=8330;	Pseudomonas aeruginosa	100000	1229.0 ± 169.2	1000000	565.4 ± 112.4
OTU_31;size=26397;	Streptococcus agalactiae	100000	3891.8 ± 355.7	1000000	2148.4 ± 434.0
OTU_9;size=74014;	Escherichia coli	100000	3056.8 ± 325.6	10000000	12654.2 ± 2590.8
OTU_15;size=50840;	Rhodobacter sphaeroides	100000	2015.8 ± 313.6	10000000	9087.0 ± 1833.8.0
OTU_5;size=133205;	Streptococcus mutans	100000	5928.4 ± 559.8	10000000	23409.0 ± 4499.0
OTU_6;size=148793;	Staphylococcus aureus/epidermidis	100000	10051.0 ± 1389.8	1000000/10,000,000	21356.0 ± 3953.0
